# Supplementary material for: Novel camphor-based pyrimidine derivatives induced cancer cell death through a ROS-mediated mitochondrial apoptosis pathway
Source: Royal Society of Chemistry journal article supplement (doi:10.1039/c9ra05900h), 2019-01-01

## Supplementary information

### **Novel camphor-based pyrimidine derivatives induced cancer cell death through ROS-mediated mitochondrial apoptosis pathway**

Yan Zhang<sup>a</sup>, Yunyun Wang<sup>a</sup>, Yuxun Zhao<sup>a</sup>, Wen Gu<sup>a,c</sup>, Yongqiang Zhu<sup>b\*</sup>, Shifa Wang<sup>a,c\*</sup>

<sup>a</sup> College of Chemical Engineering, Nanjing Forestry University, Nanjing, 210037, P. R. China

<sup>b</sup> Jiangsu Chia Tai Fenghai Pharmaceutical Co. Ltd, Nanjing, 210046, P. R. China

<sup>c</sup> Co-Innovation Center of Efficient Processing and Utilization of Forest Resources, Nanjing Forestry University, Nanjing, 210037, P. R. China

\*Corresponding author at: College of Chemical Engineering, Nanjing Forestry University, Nanjing, 210037, P. R. China.

E-mail address: wangshifa65@163.com (S. Wang).

**Table S1** Crystallographic data of compound **3f**

| Parameter                                        | Value                                             |
|--------------------------------------------------|---------------------------------------------------|
| Empirical formula                                | C <sub>18</sub> H <sub>20</sub> Cl N <sub>3</sub> |
| Mr                                               | 313.82                                            |
| space group                                      | <i>P</i> -1                                       |
| a [Å]                                            | 6.9895(2)                                         |
| b [Å]                                            | 8.6676(3)                                         |
| c [Å]                                            | 13.6291(5)                                        |
| α [deg]                                          | 76.606(2)                                         |
| β [deg]                                          | 81.336(2)                                         |
| γ [deg]                                          | 79.948(2)                                         |
| Volume [Å <sup>3</sup> ]                         | 785.64(5)                                         |
| Z                                                | 2                                                 |
| D <sub>c</sub> [mg/m <sup>3</sup> ]              | 1.327                                             |
| F (000)                                          | 332                                               |
| T [K]                                            | 130(2)                                            |
| wavelength [Å]                                   | 0.71073                                           |
| absorption coefficient [mm <sup>-1</sup> ]       | 0.243                                             |
| completeness to theta                            | 30.54 (96.3 %)                                    |
| reflections collected/unique                     | 16738/4625 [R(int) = 0.0533]                      |
| data/restraints/parameters                       | 4625/0/199                                        |
| R <sub>1</sub> , wR <sub>2</sub> [I>2σ(I)]       | 0.0679, 0.1356                                    |
| R <sub>1</sub> , wR <sub>2</sub> (all data)      | 0.1118, 0.1543                                    |
| goodness of fit on F <sup>2</sup>                | 1.013                                             |
| largest diff. peak and hole [e.Å <sup>-3</sup> ] | 0.610 and -0.301                                  |

$^1\text{H}$  NMR spectra,  $^{13}\text{C}$  NMR and HRMS for target compounds.

3a

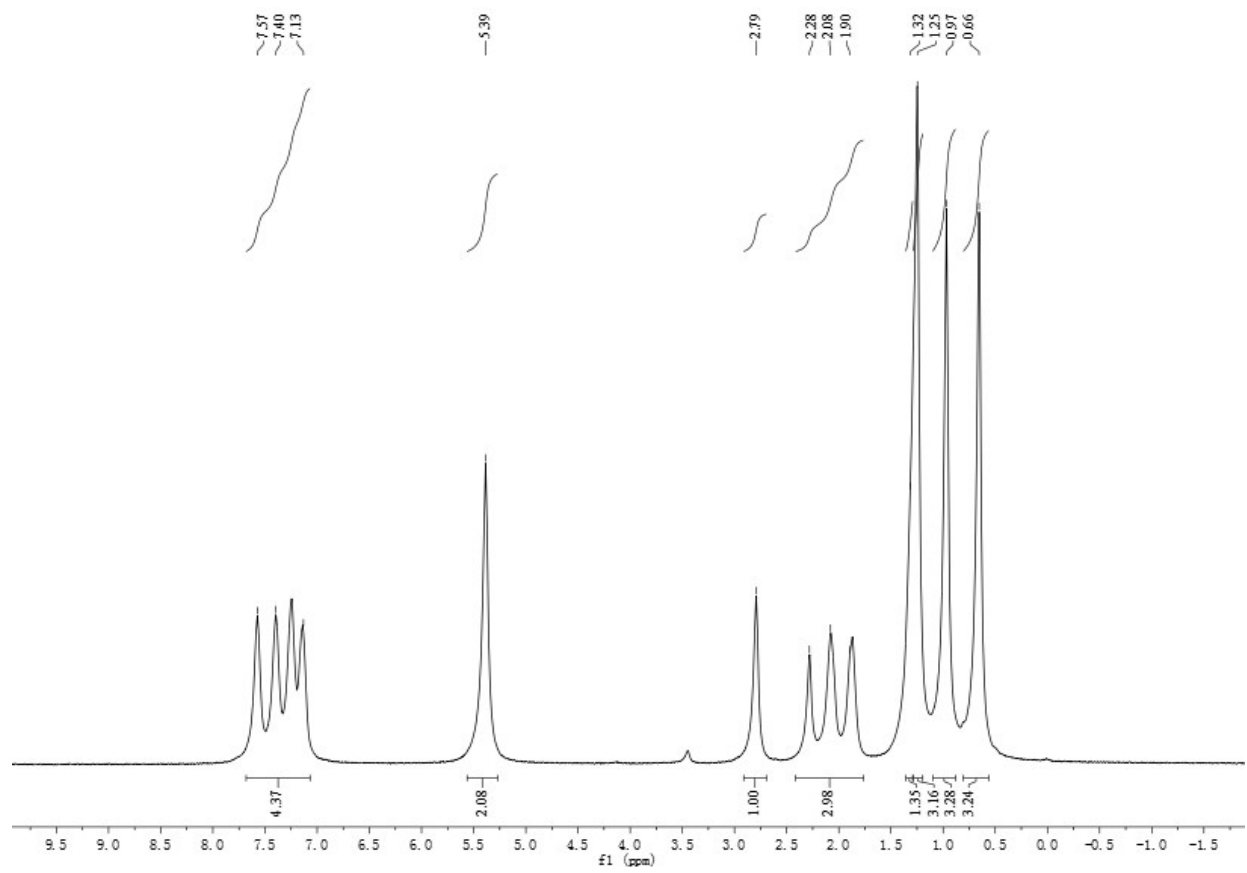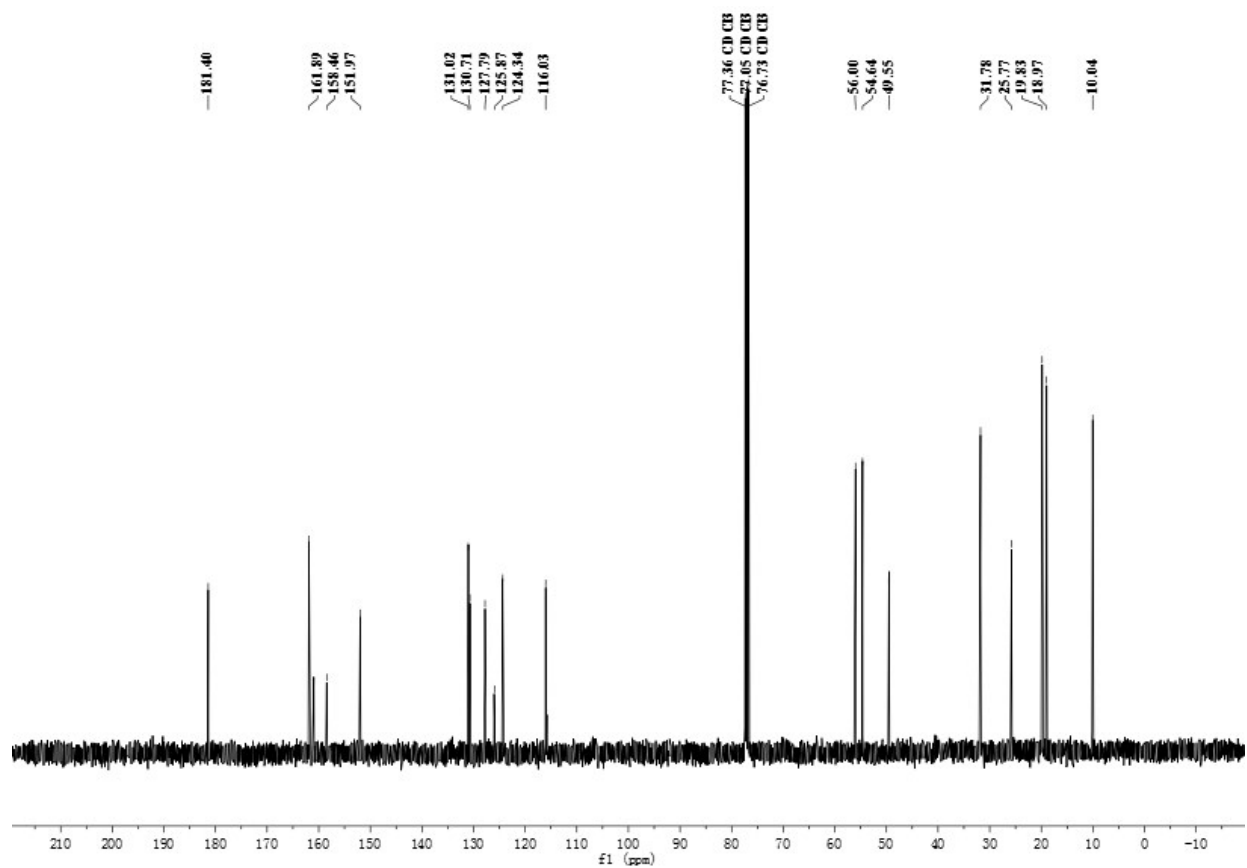

3b

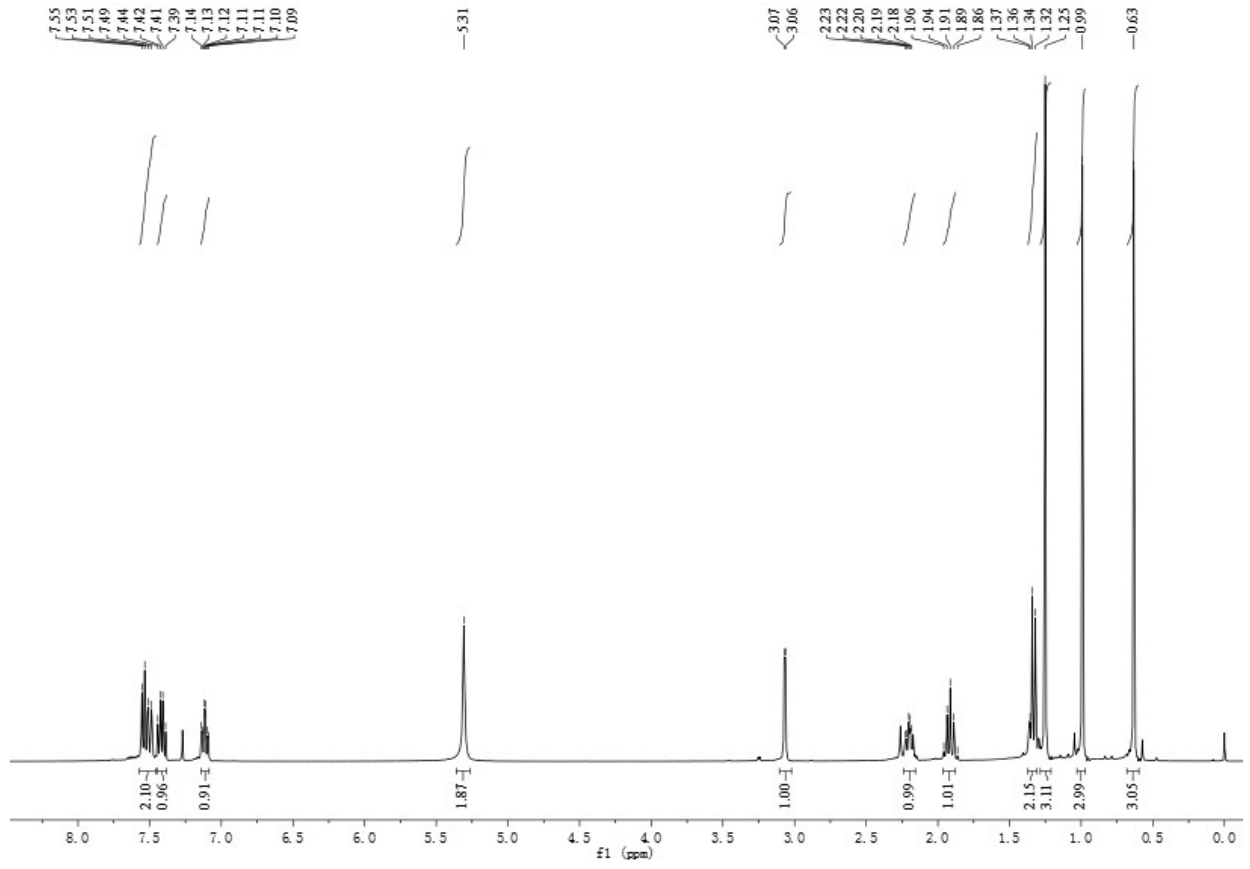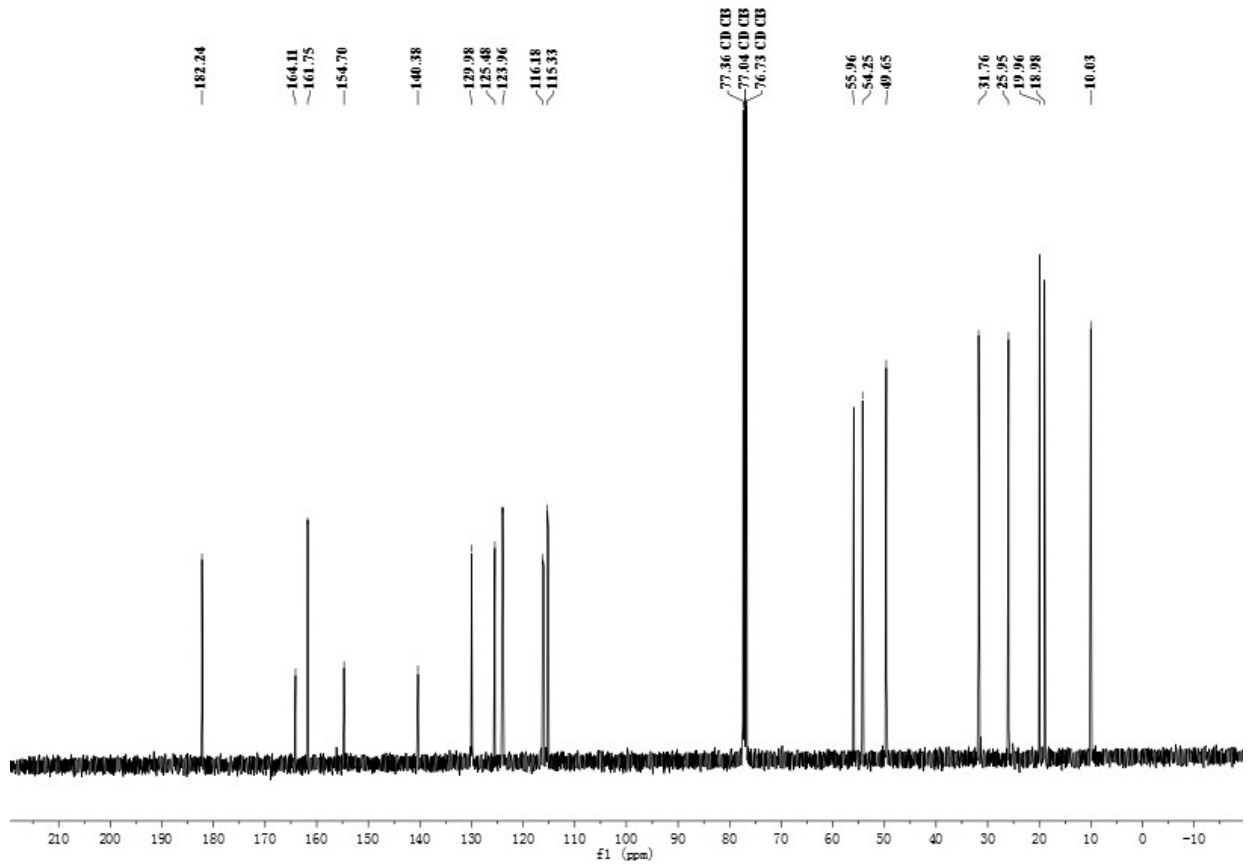

3c

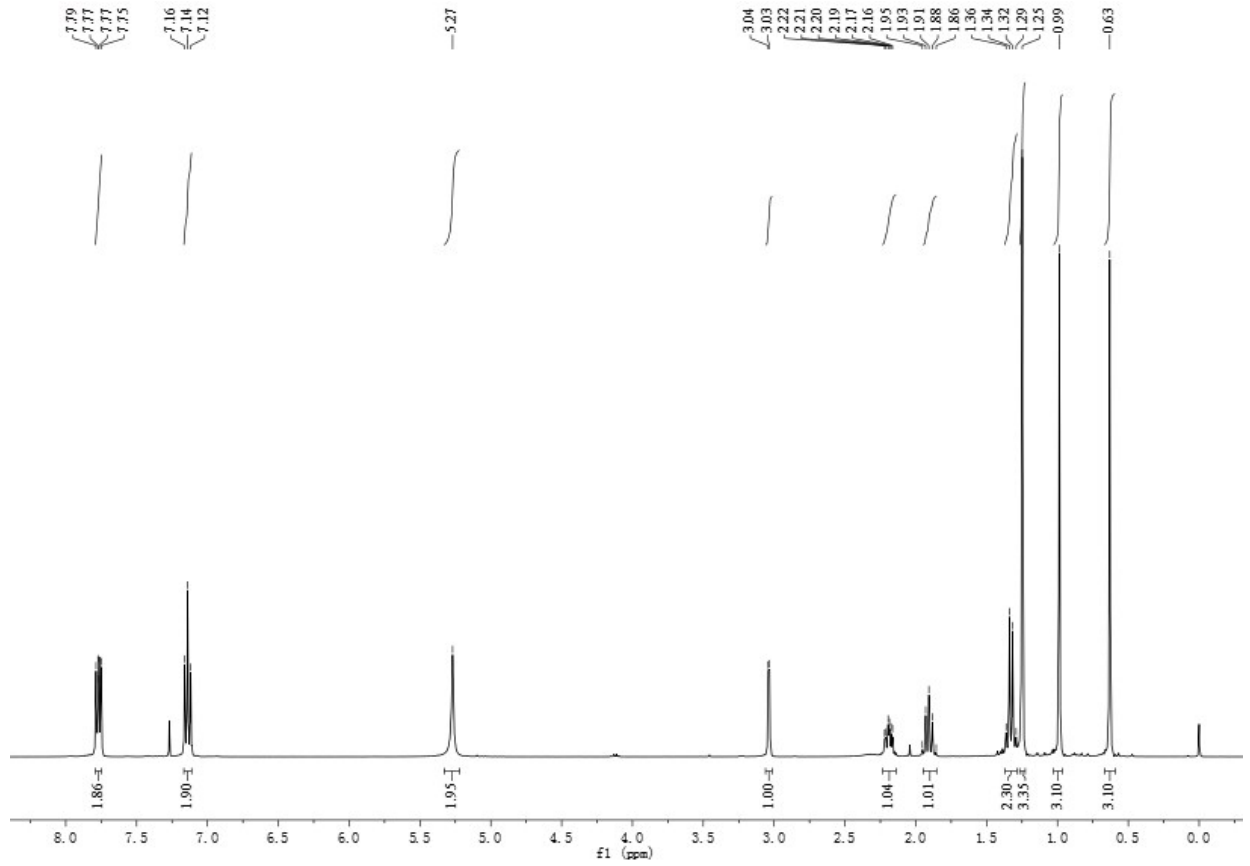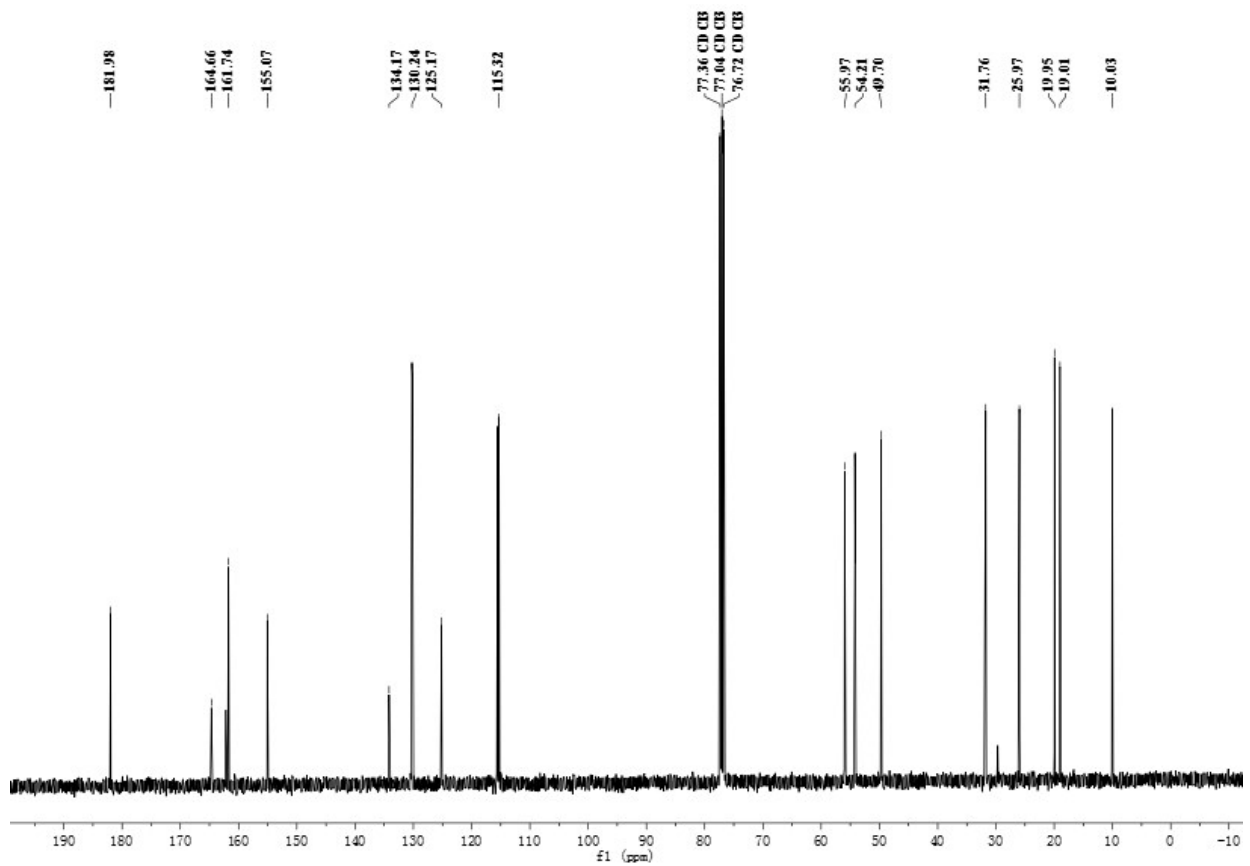

3d

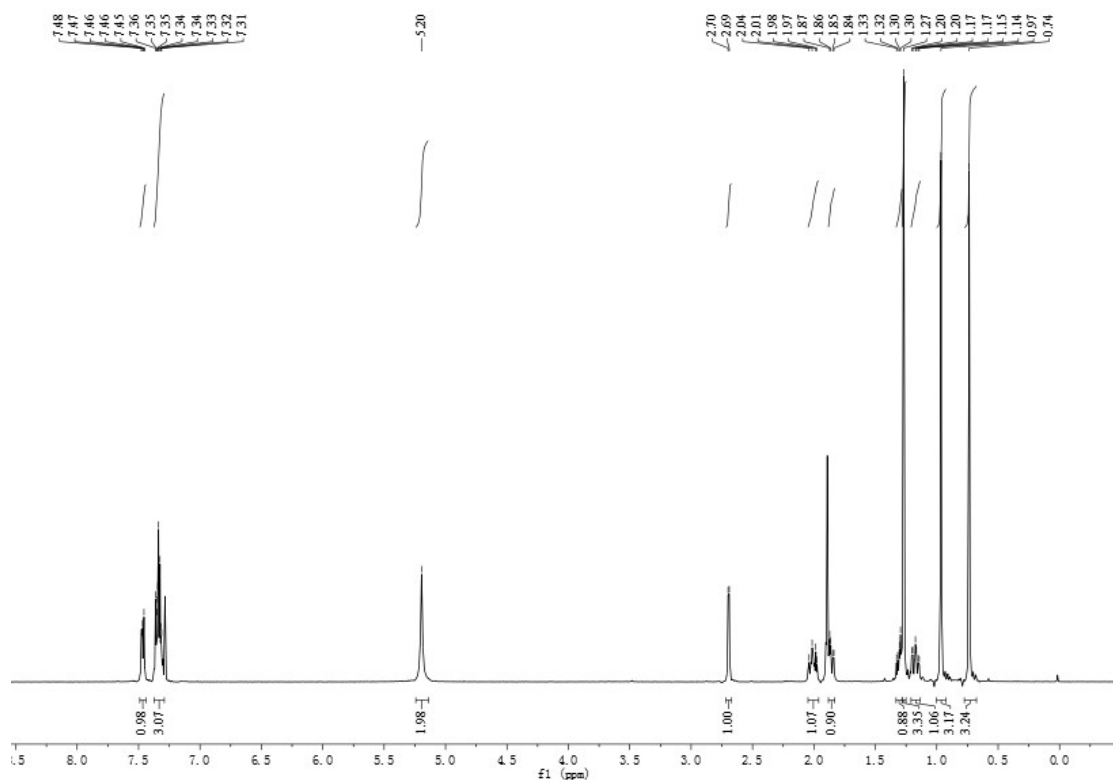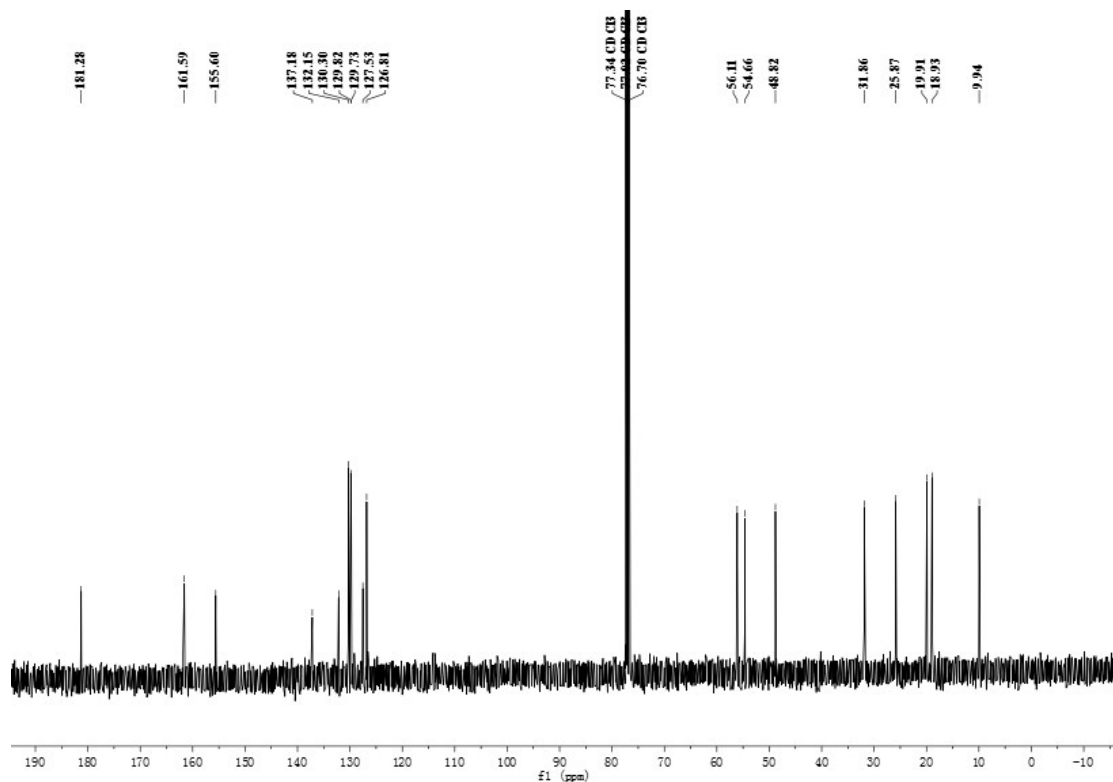

3e

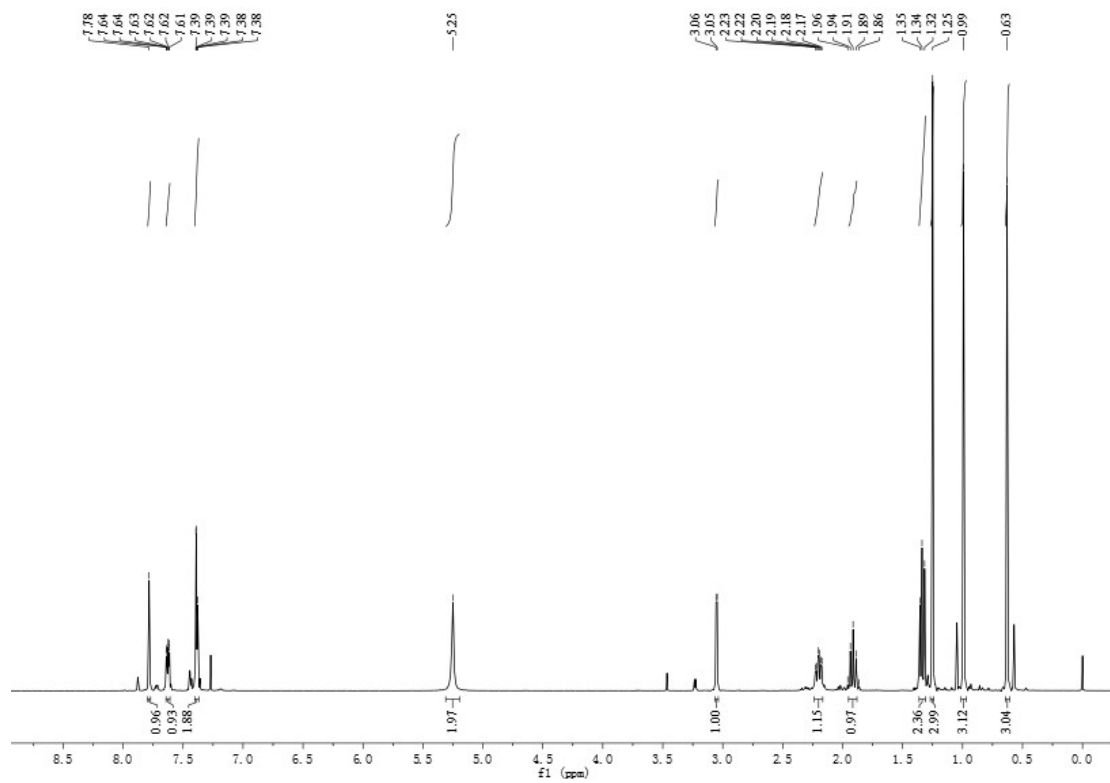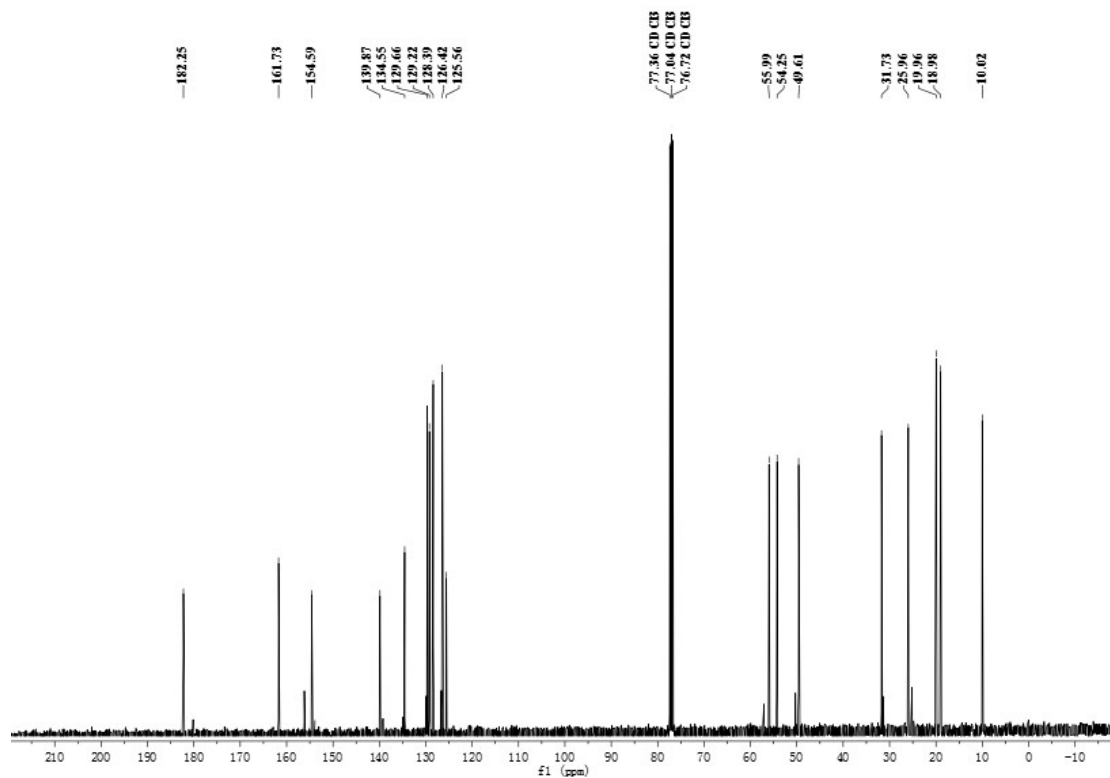

3f

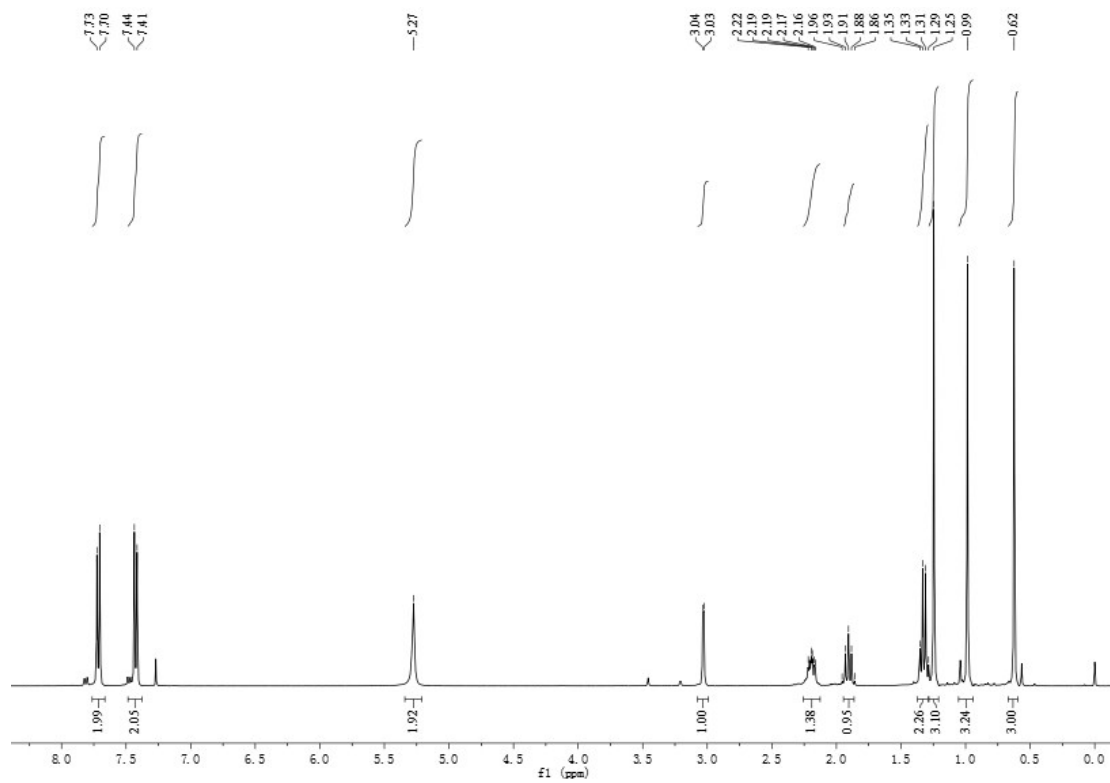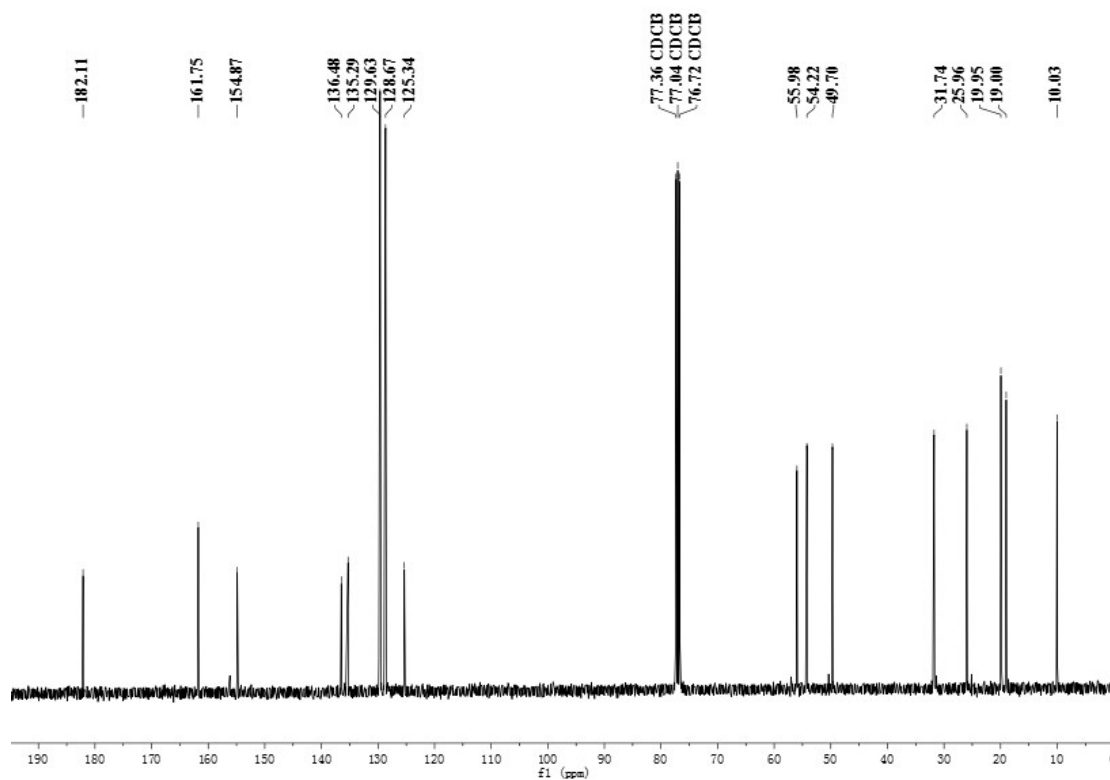



3g

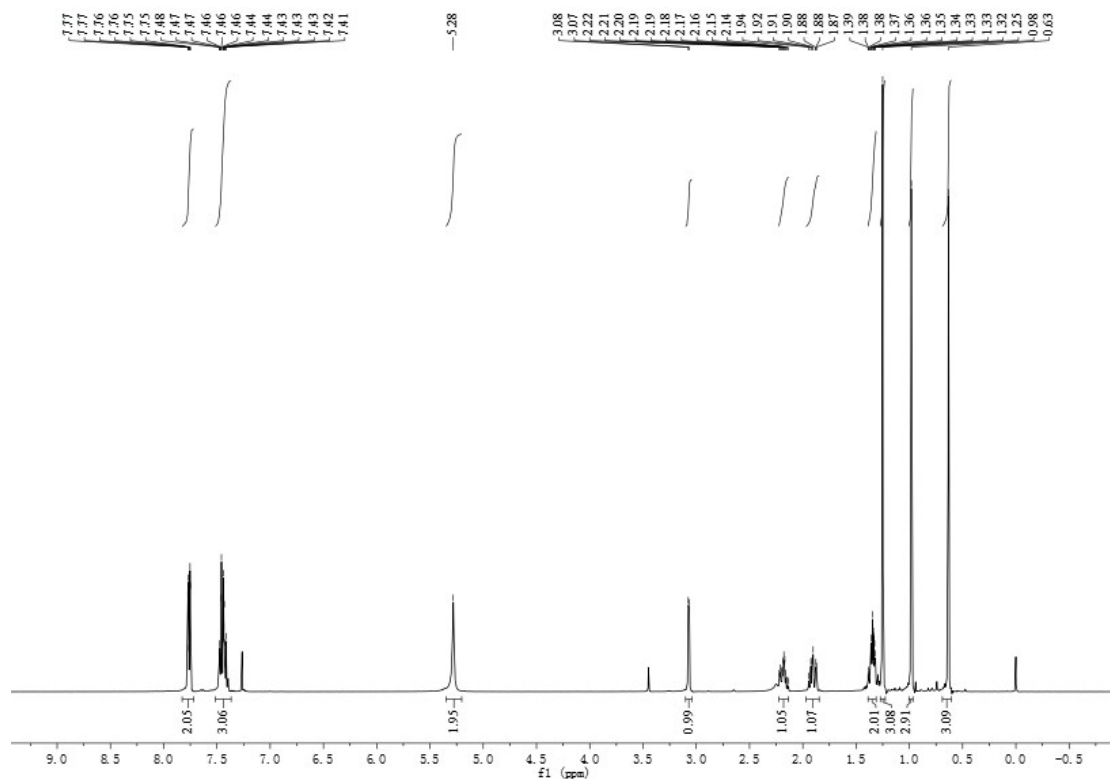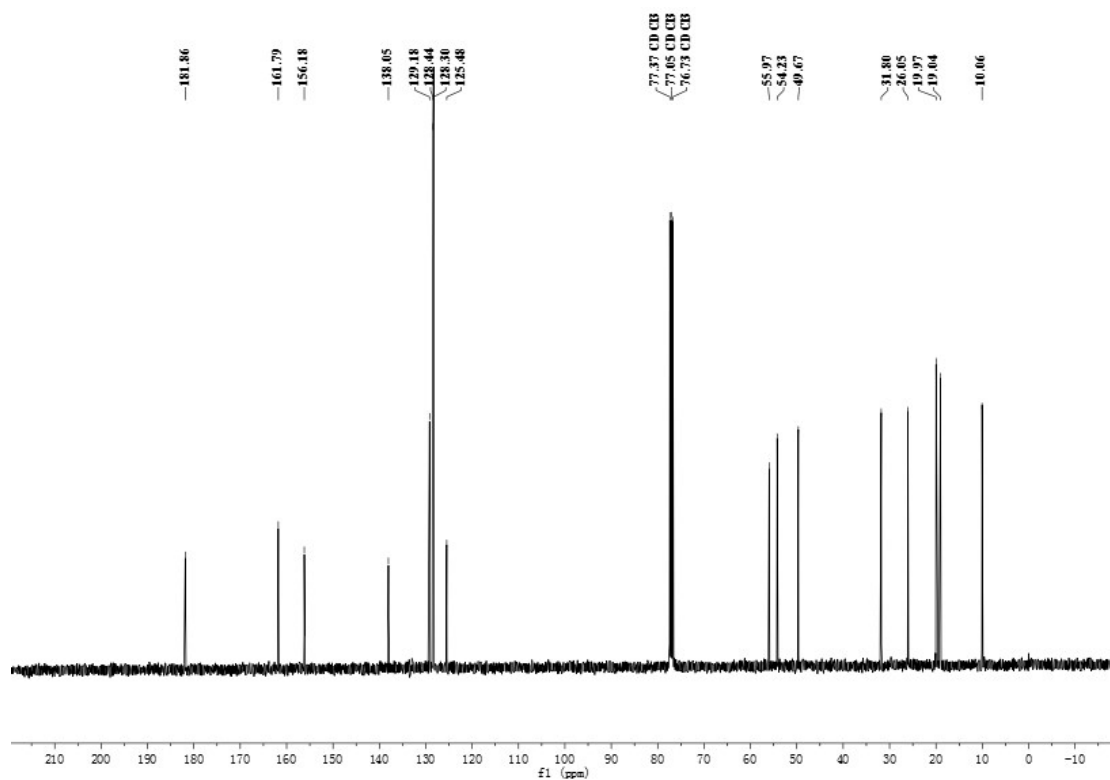

3h

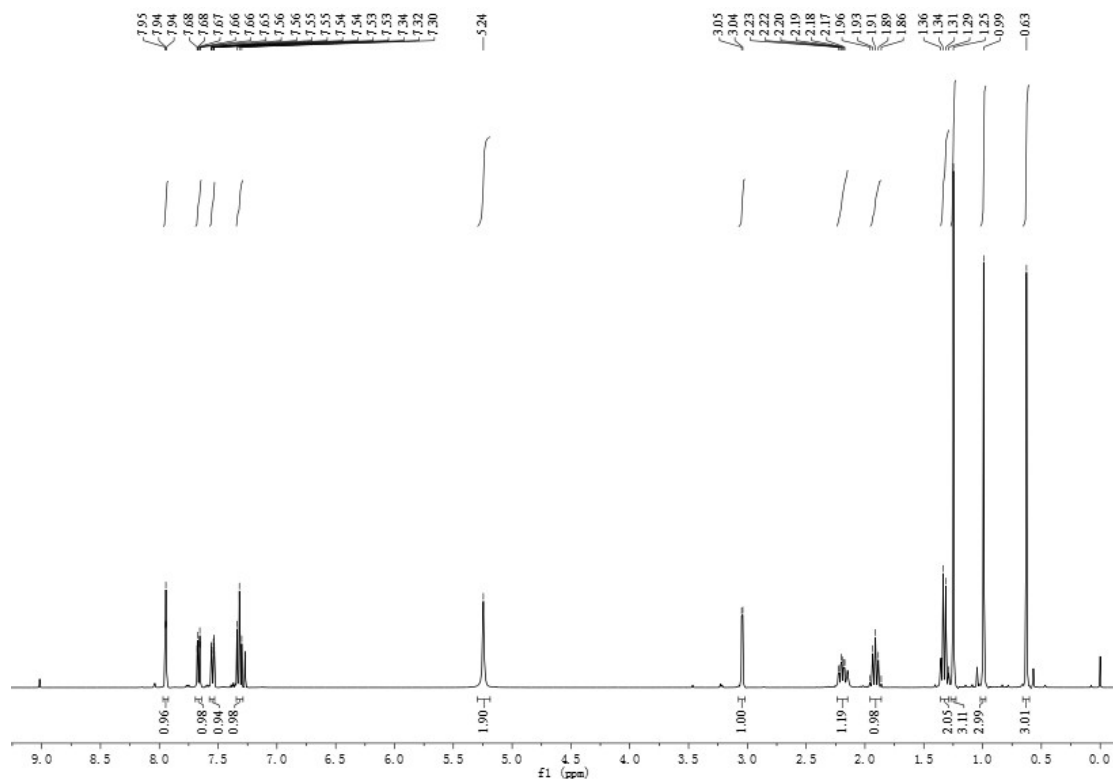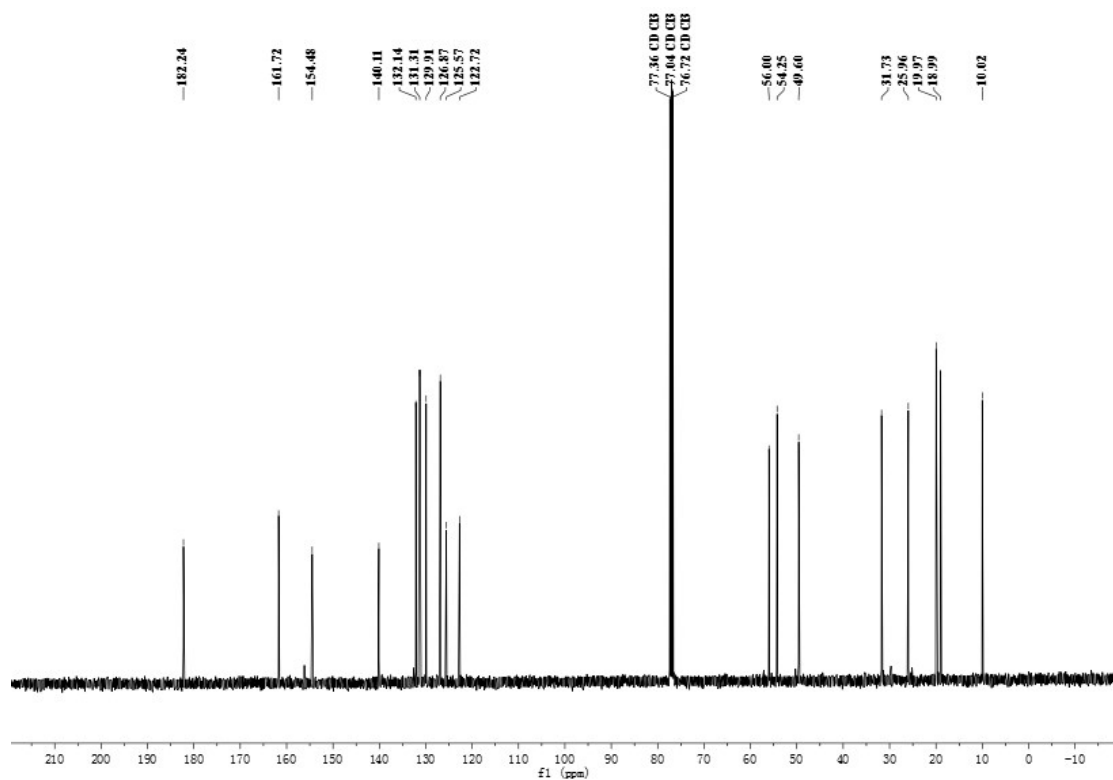

3i

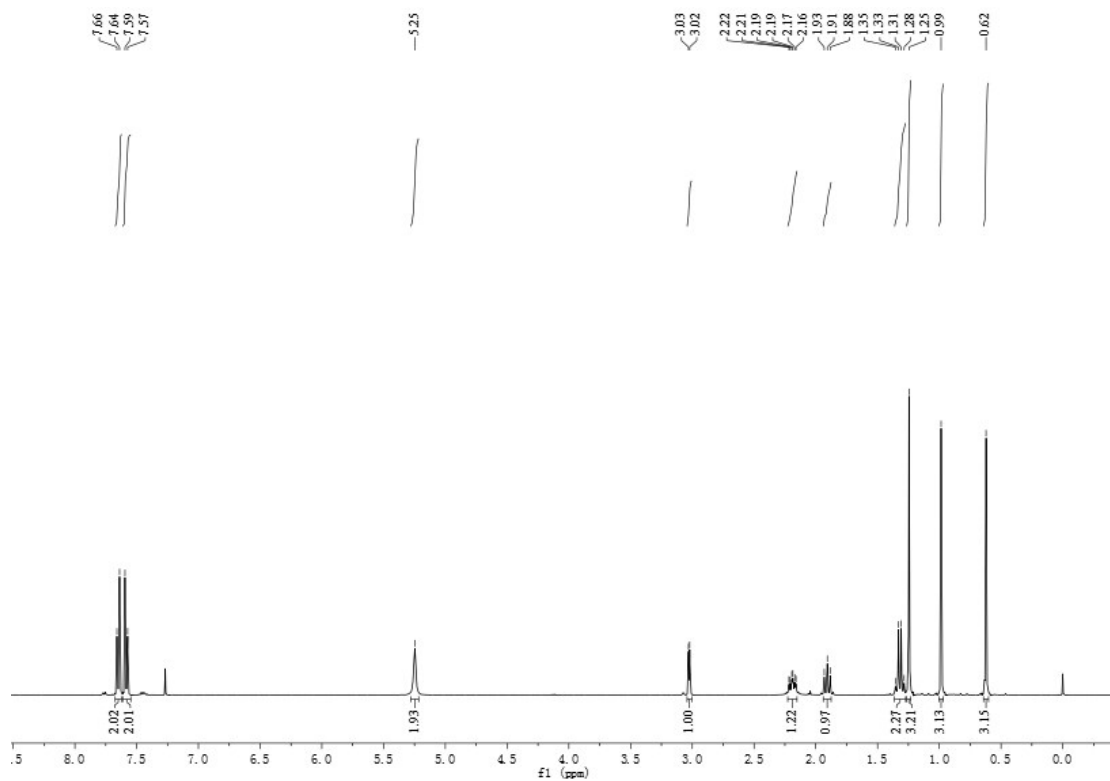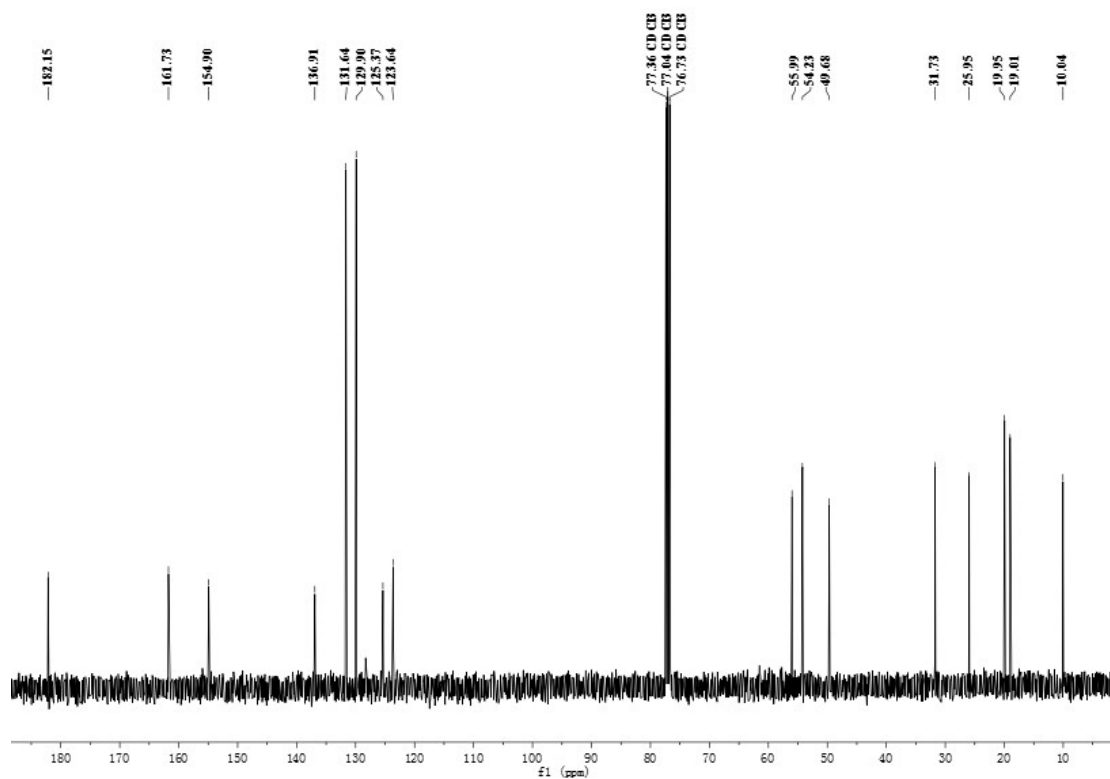

3j

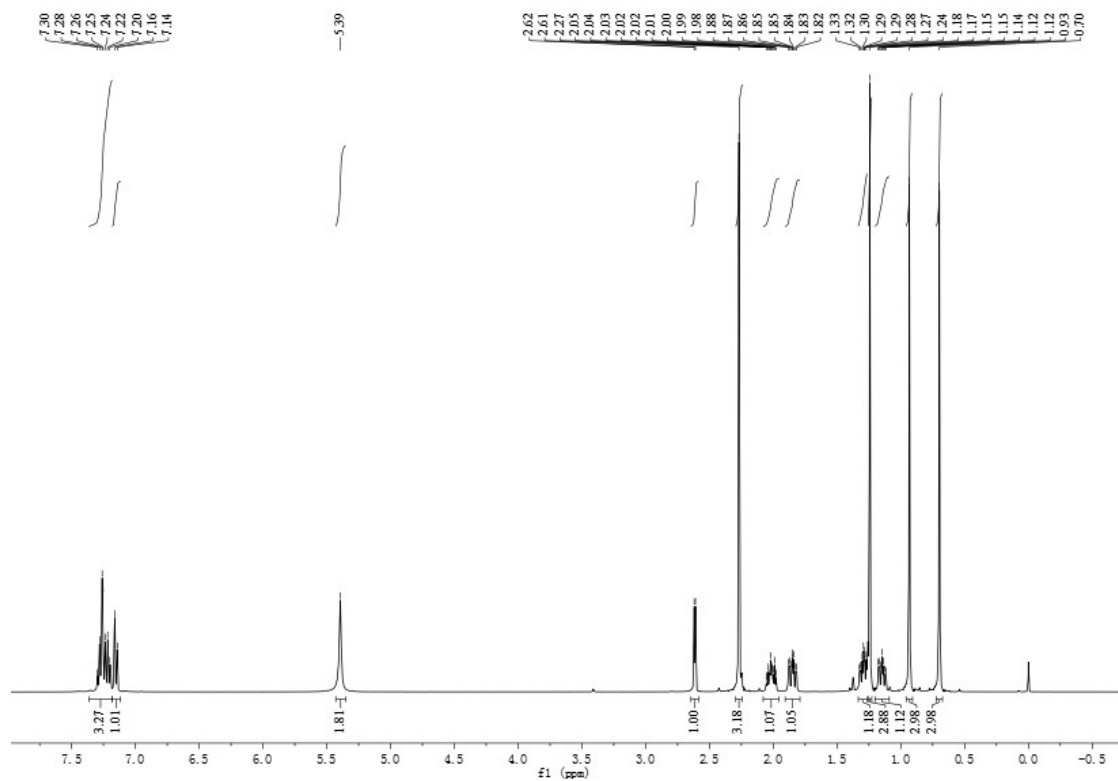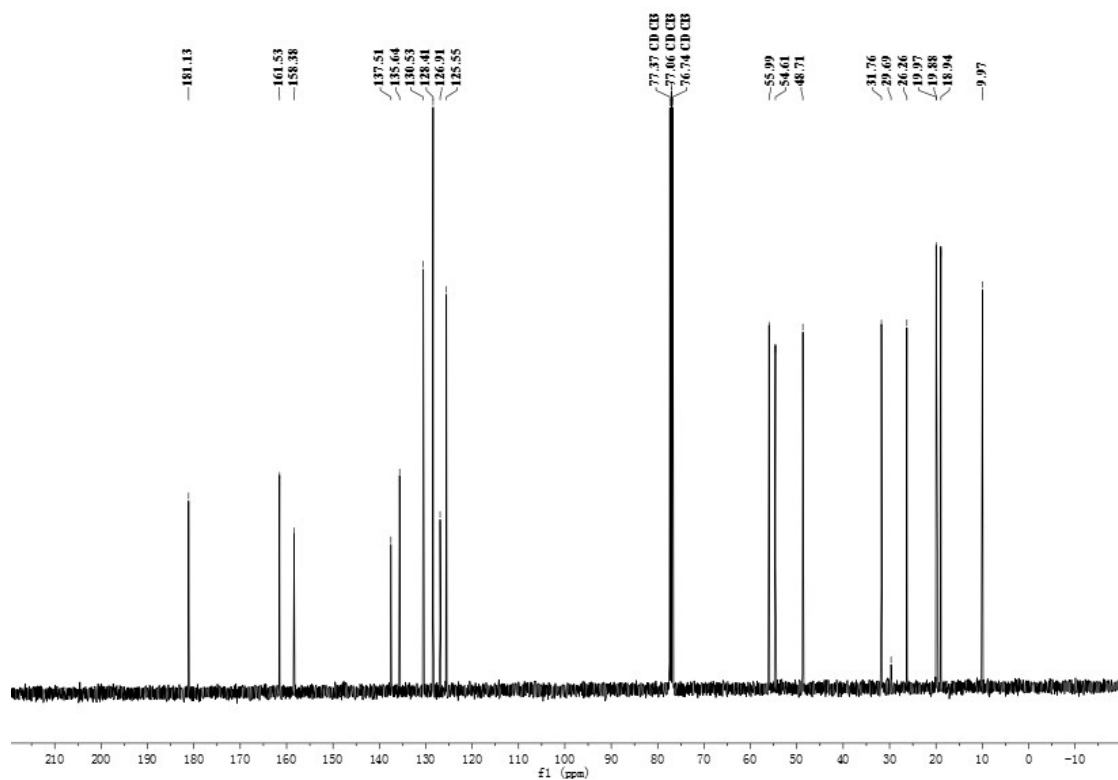

3k

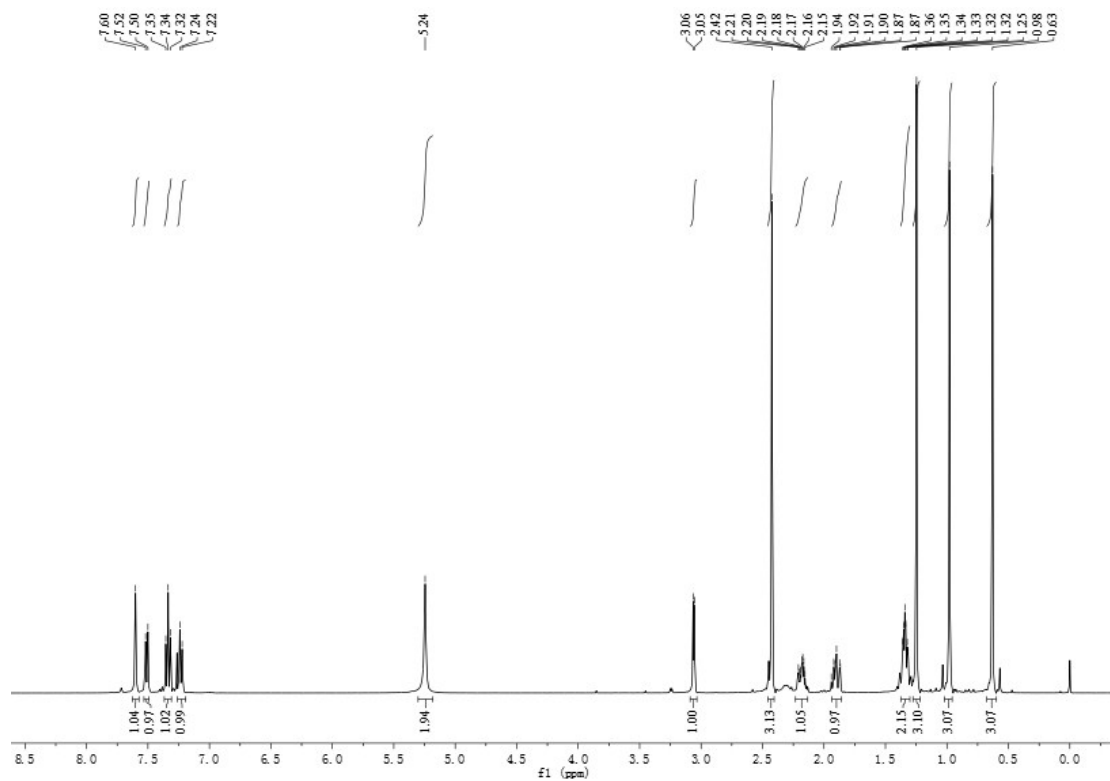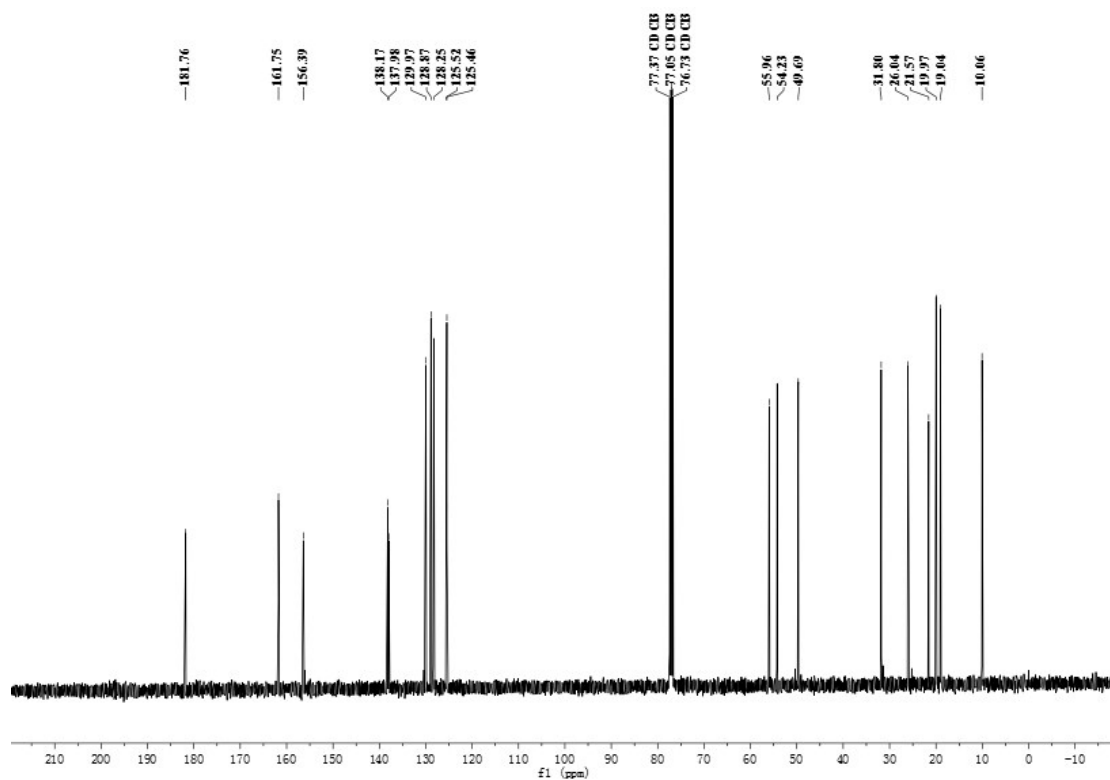

31

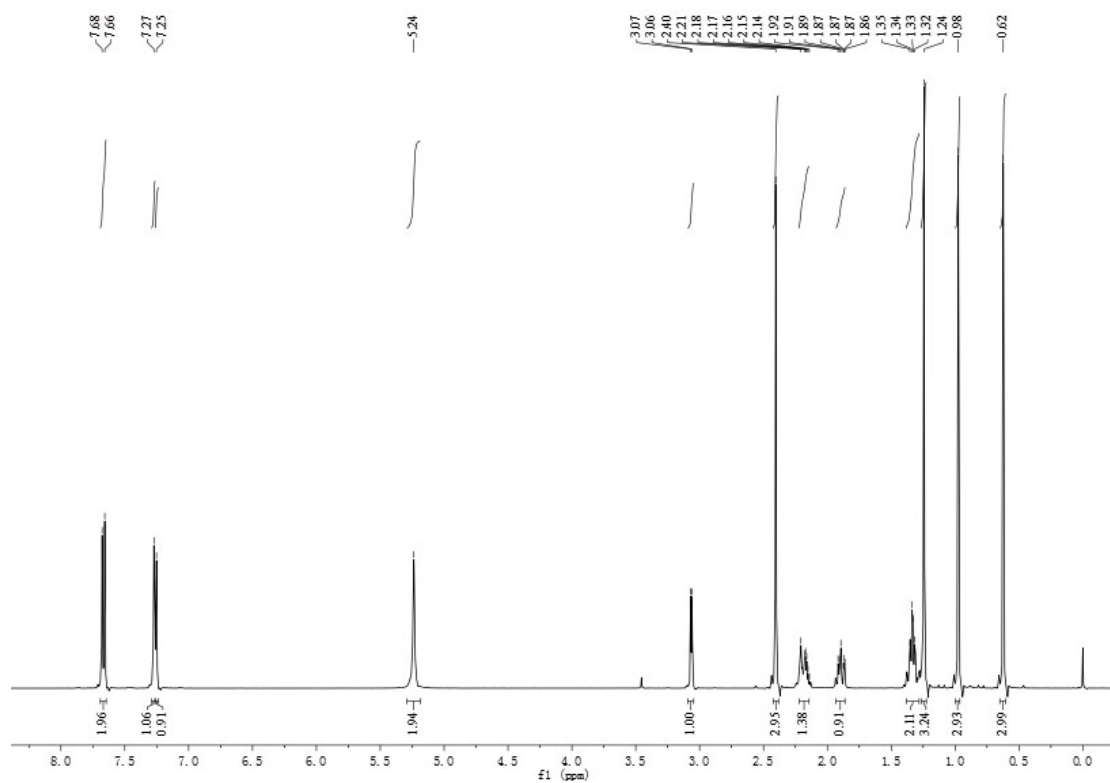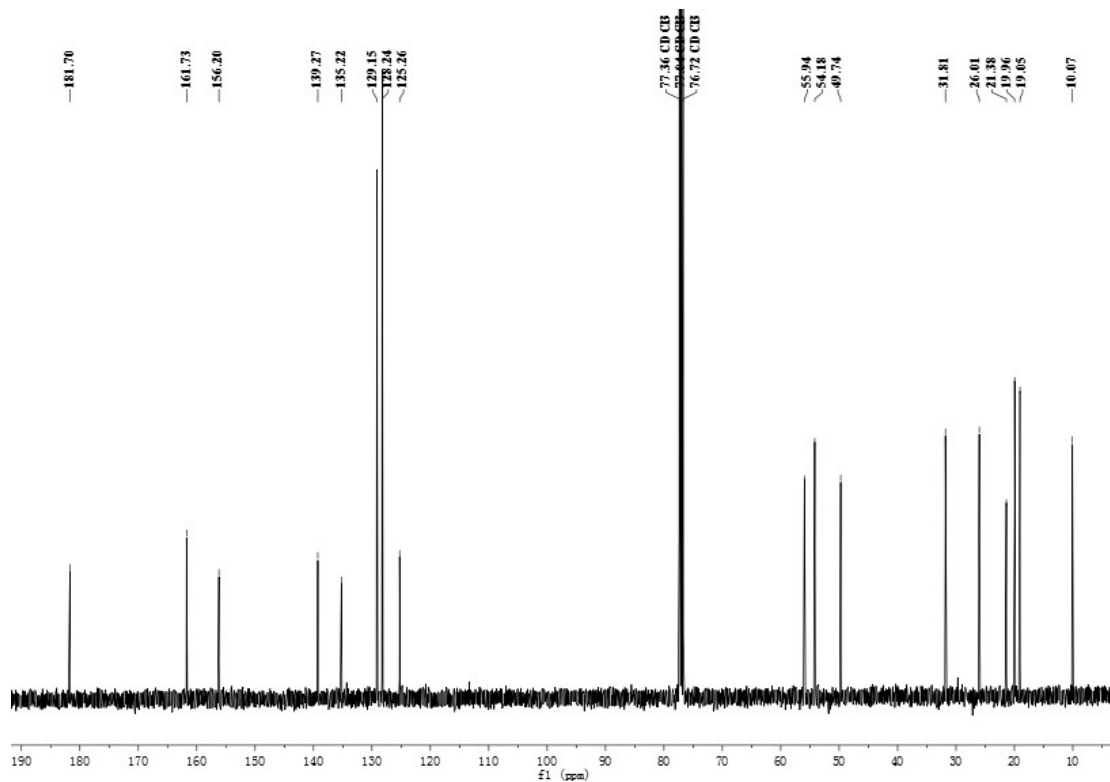

3m

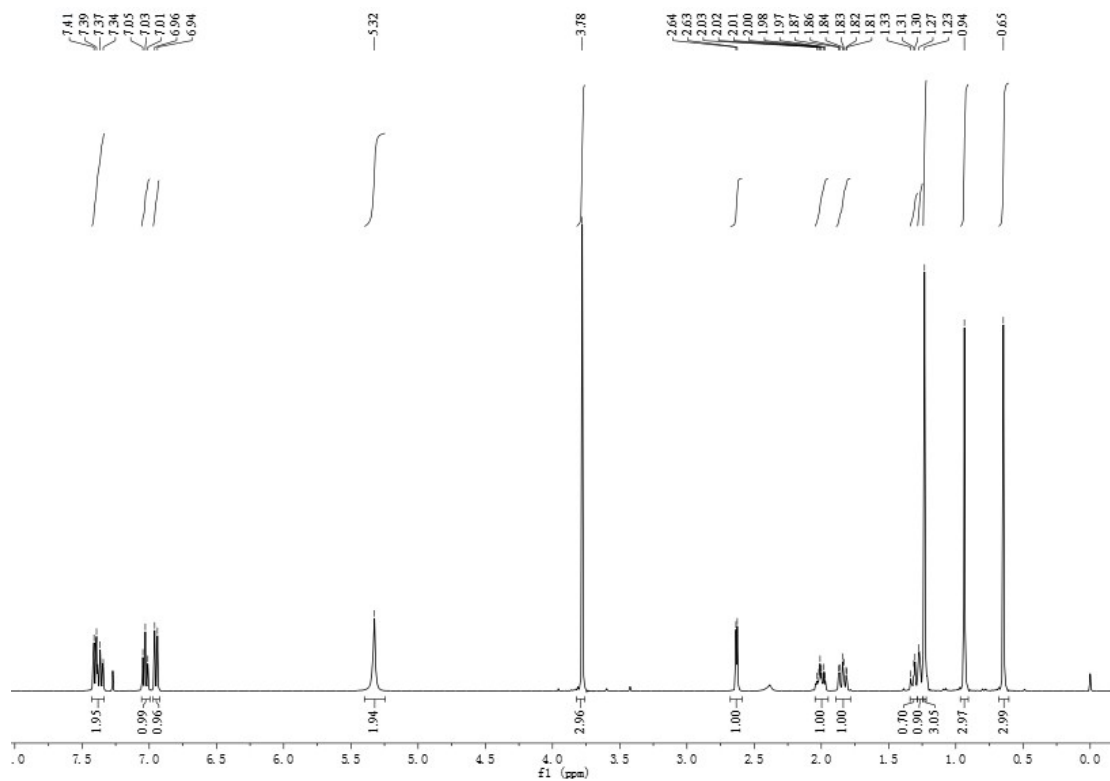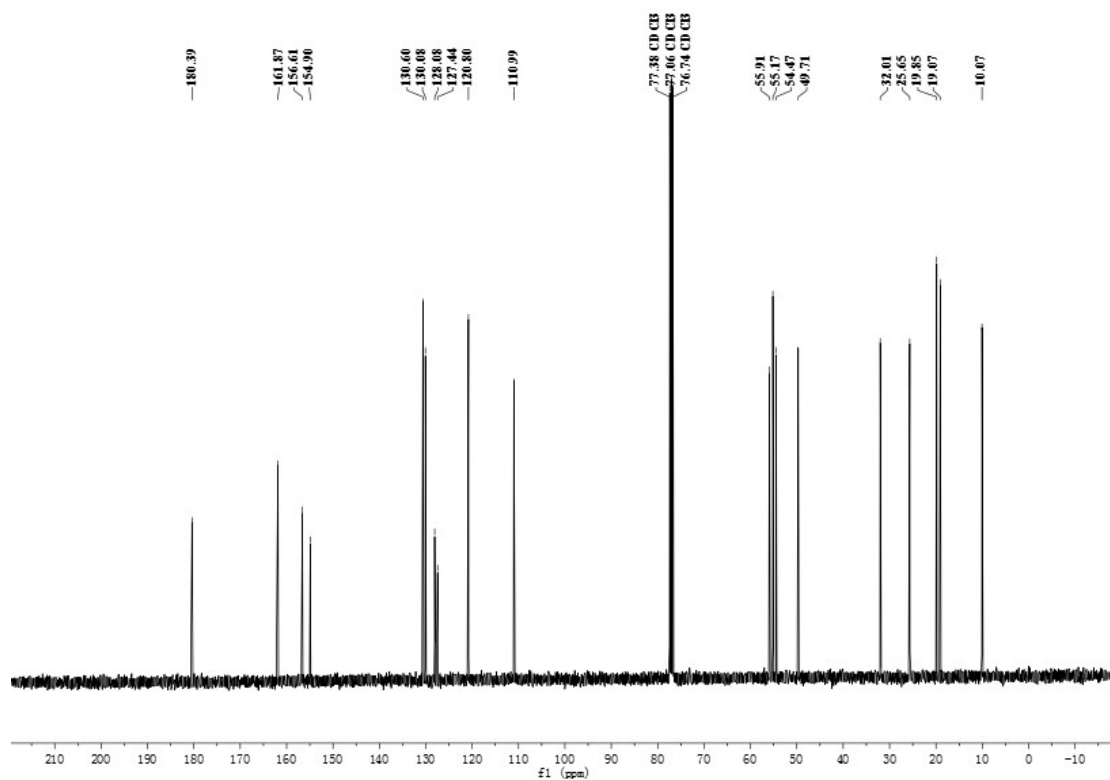

3n

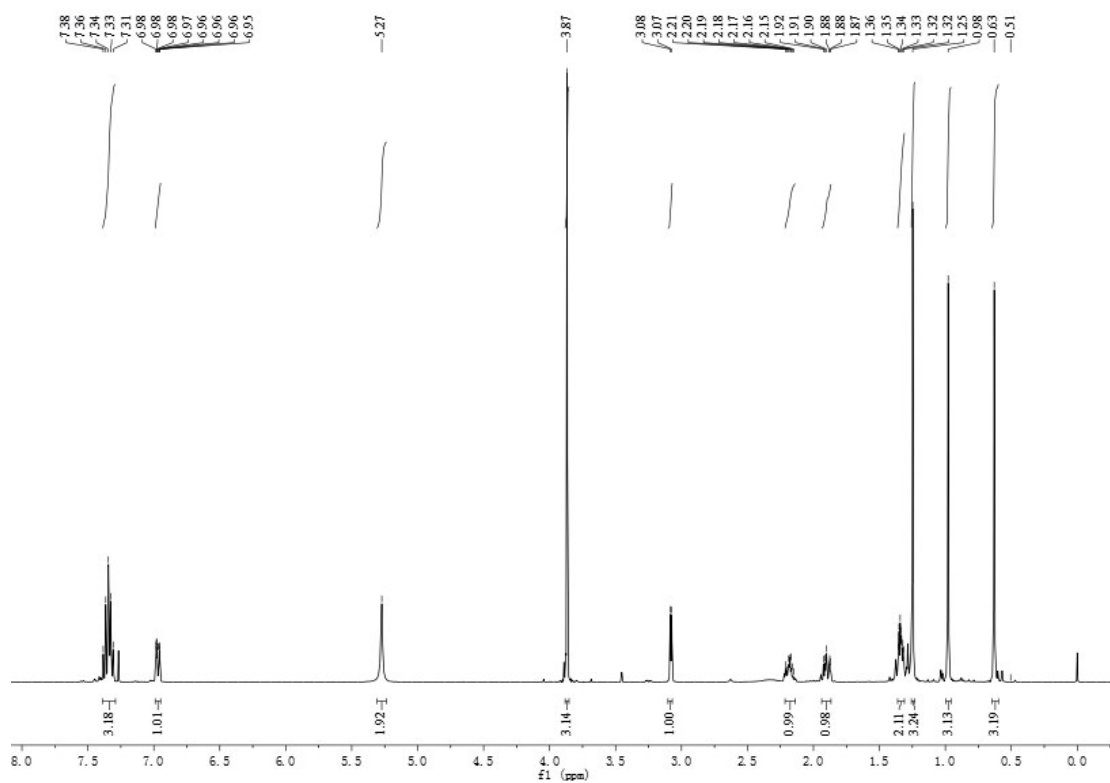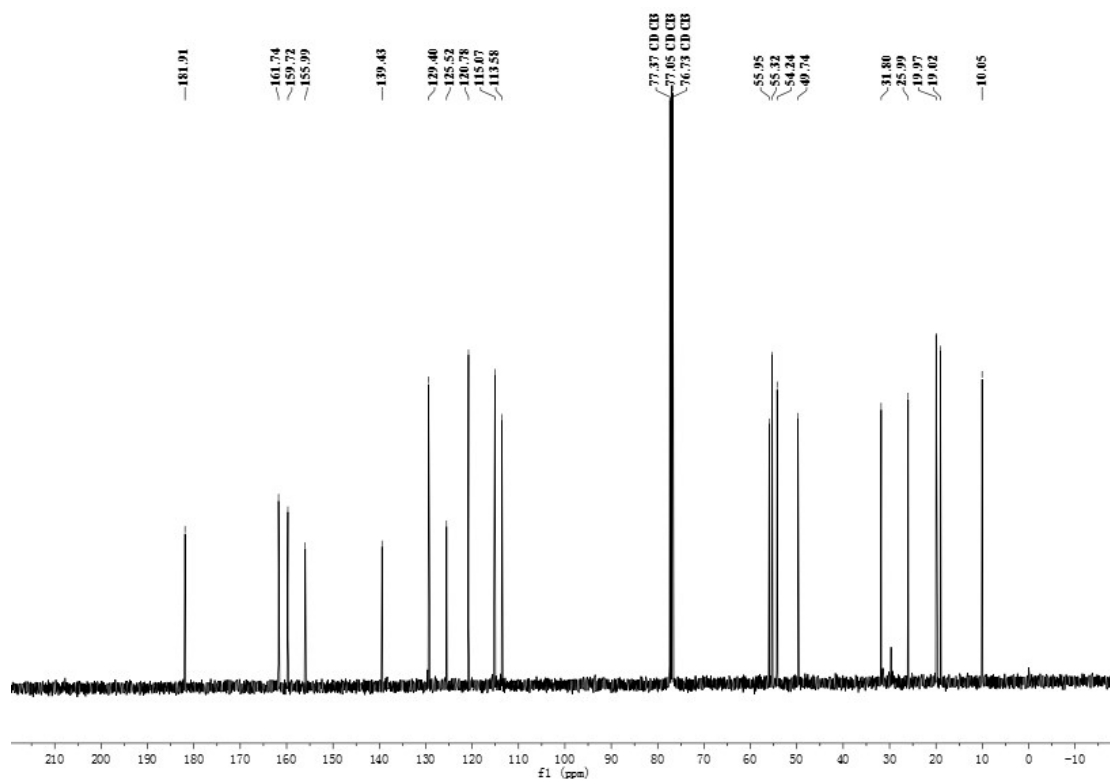



30

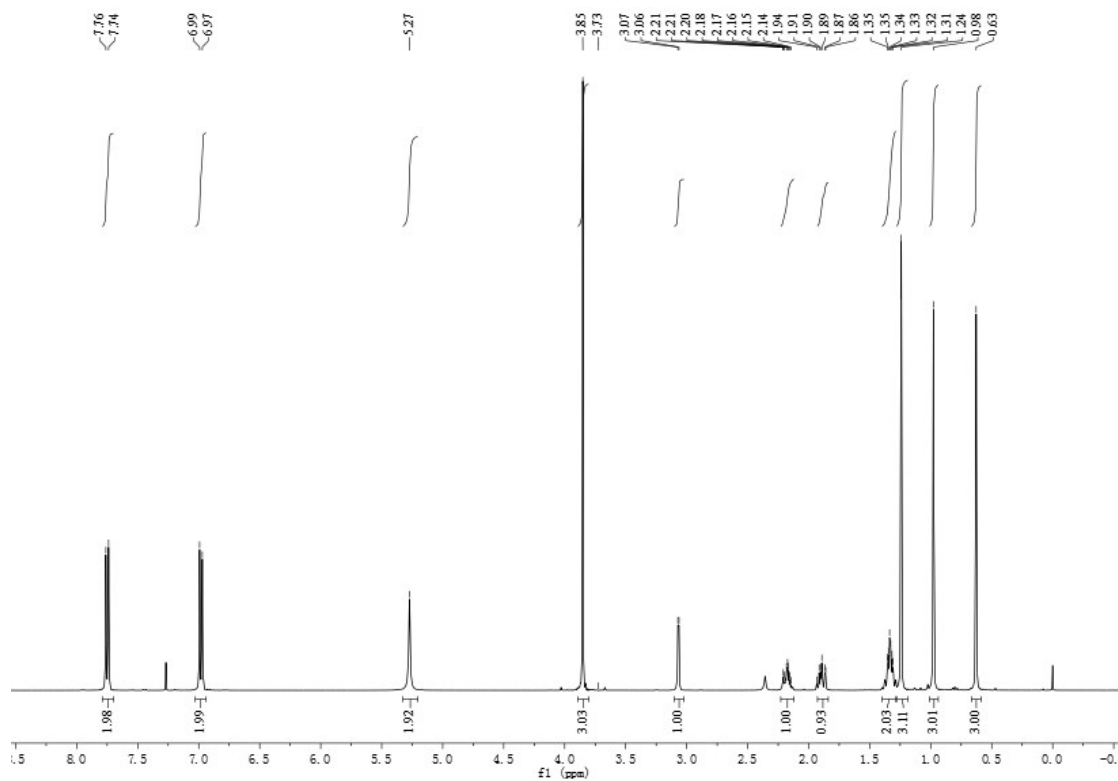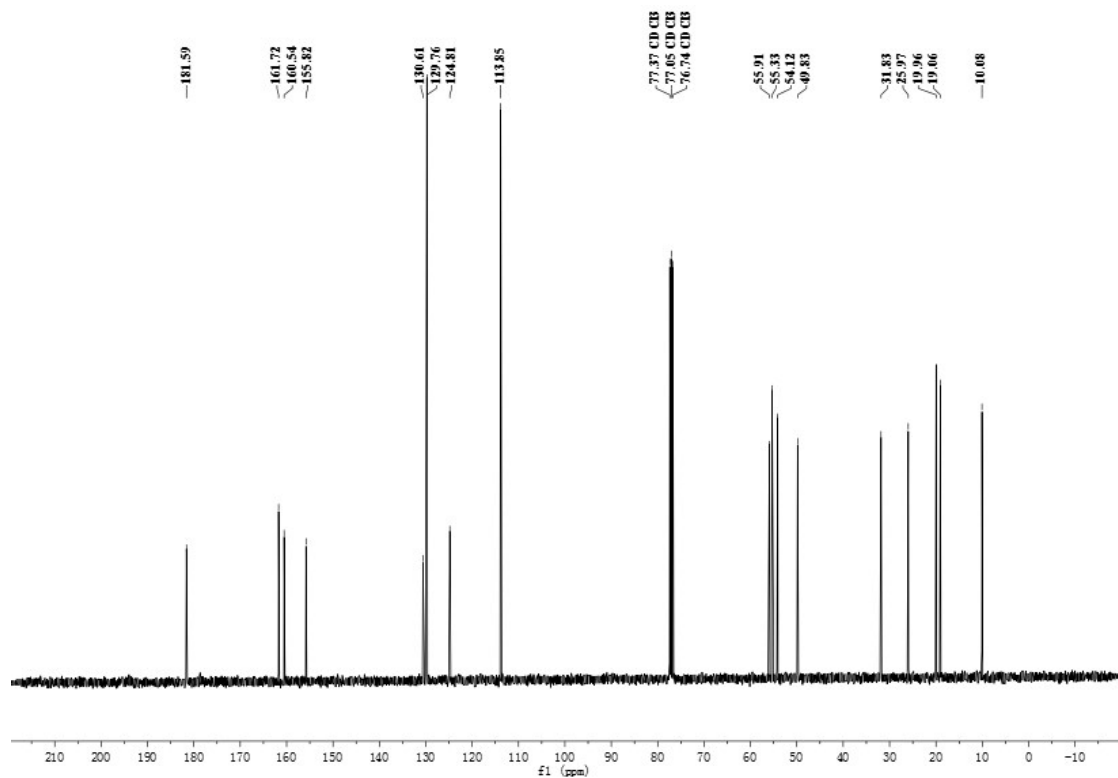

3p

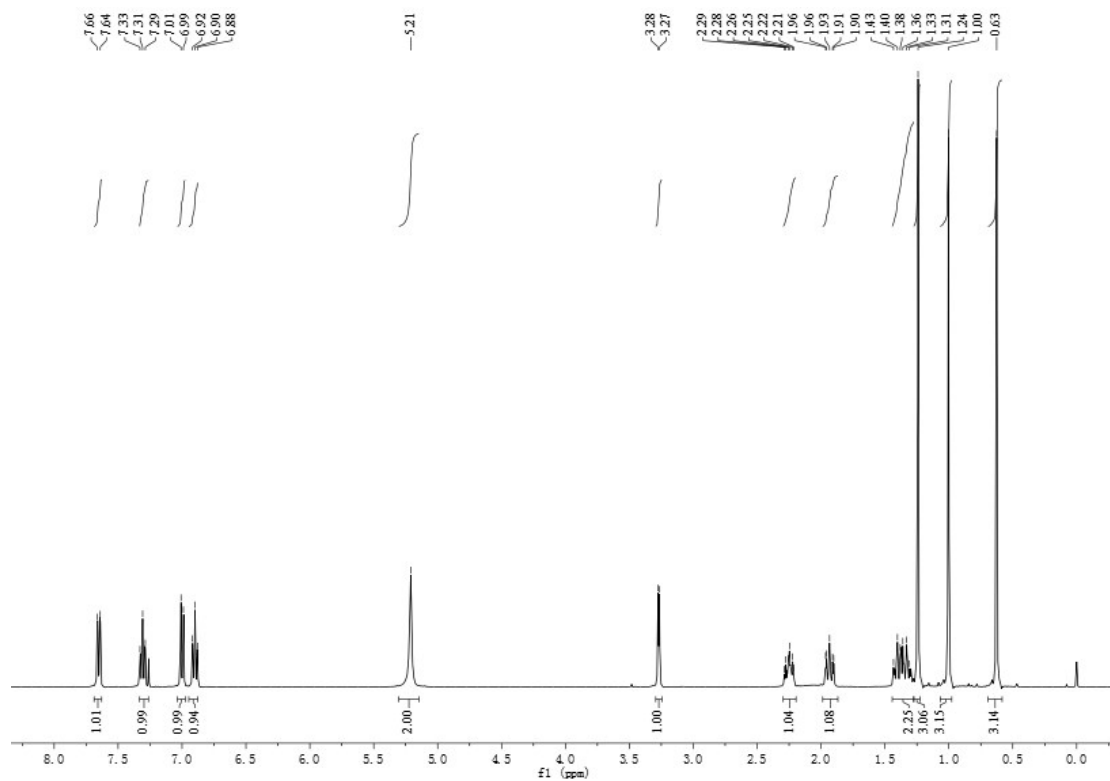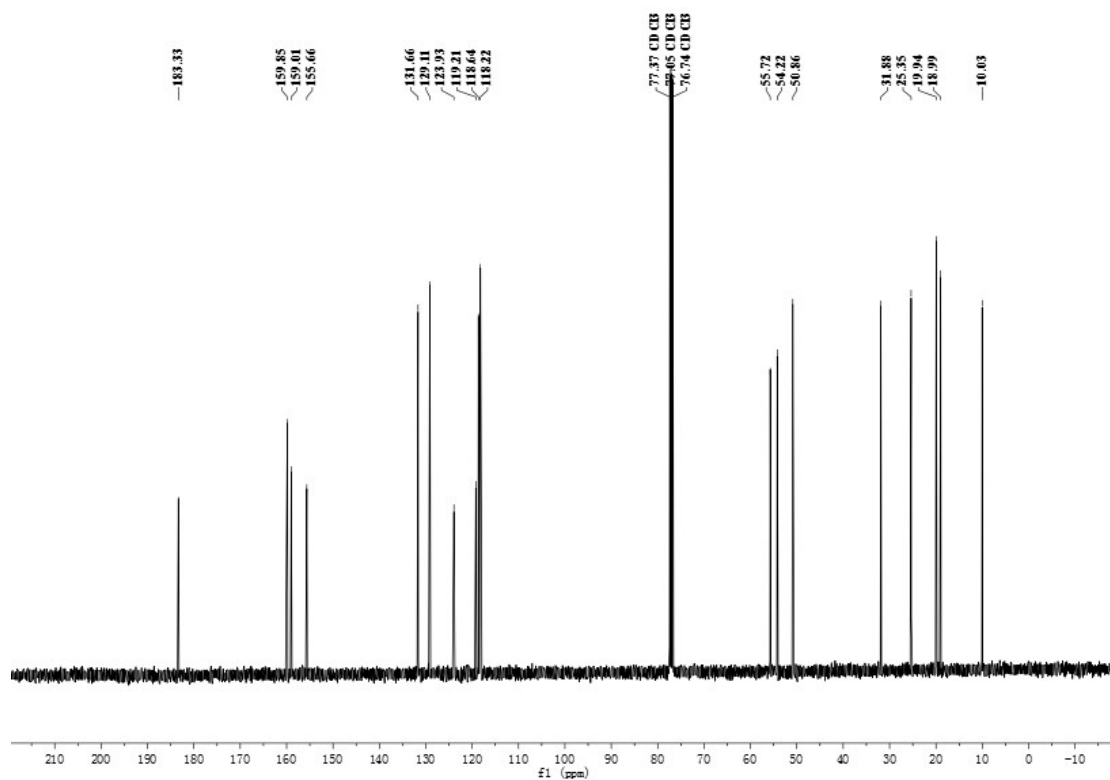

3q

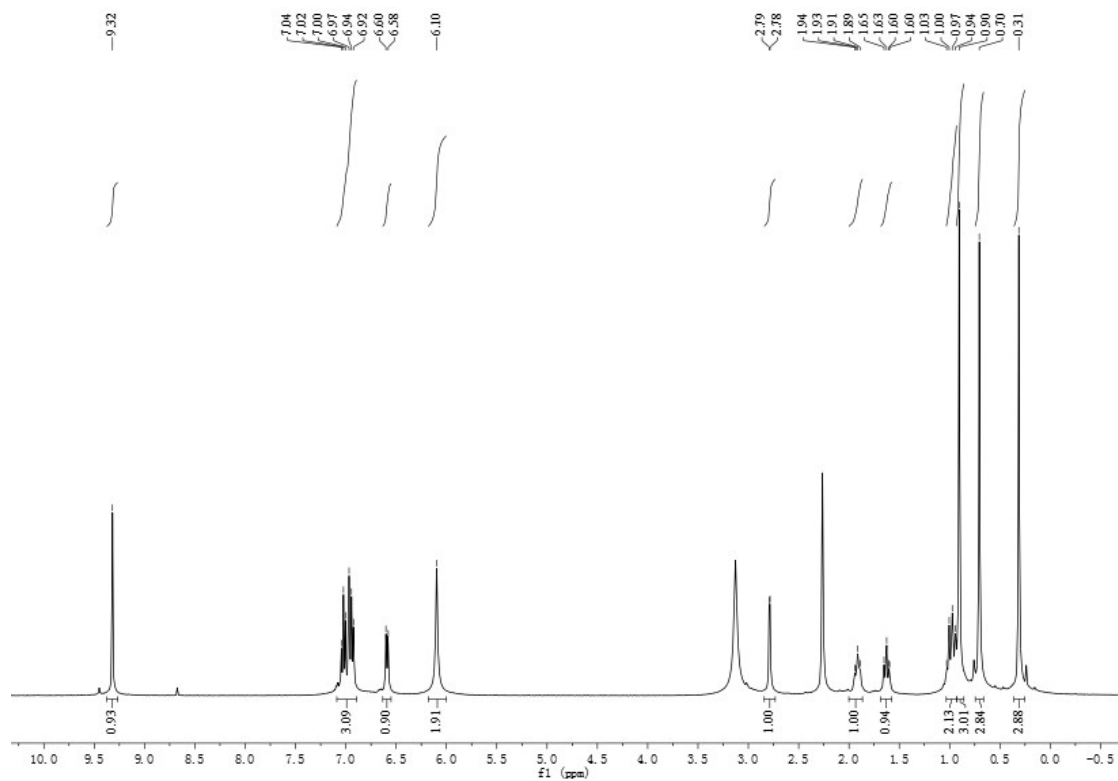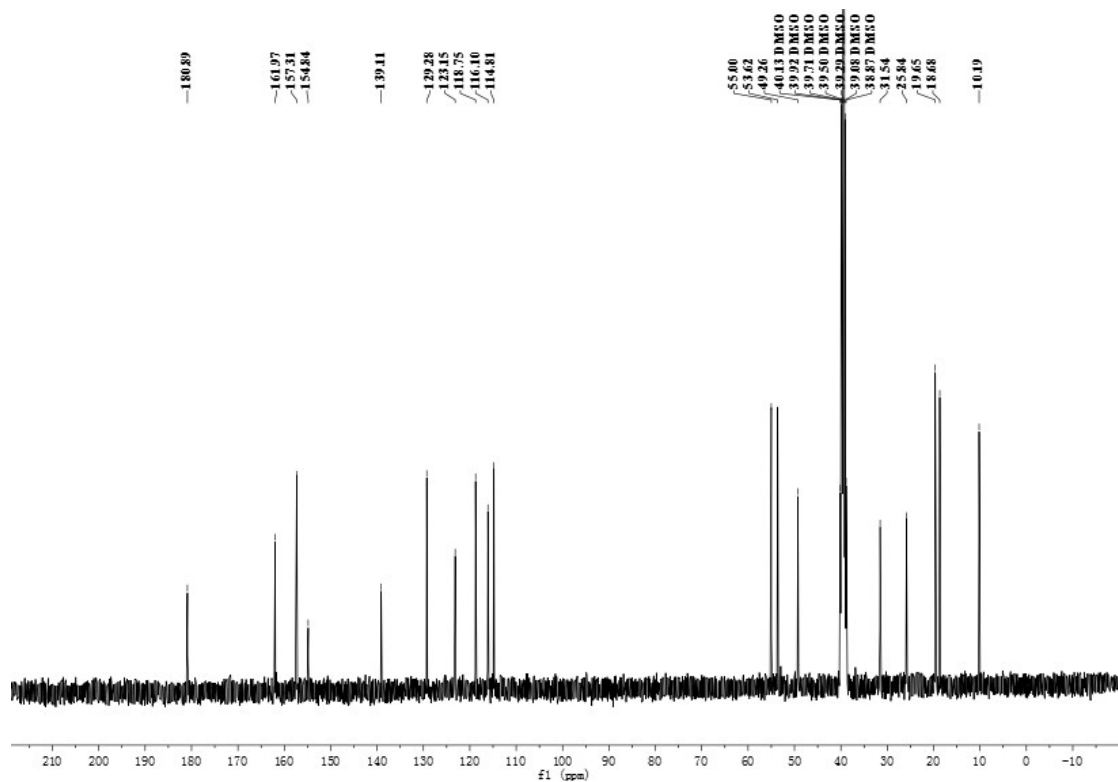

3r

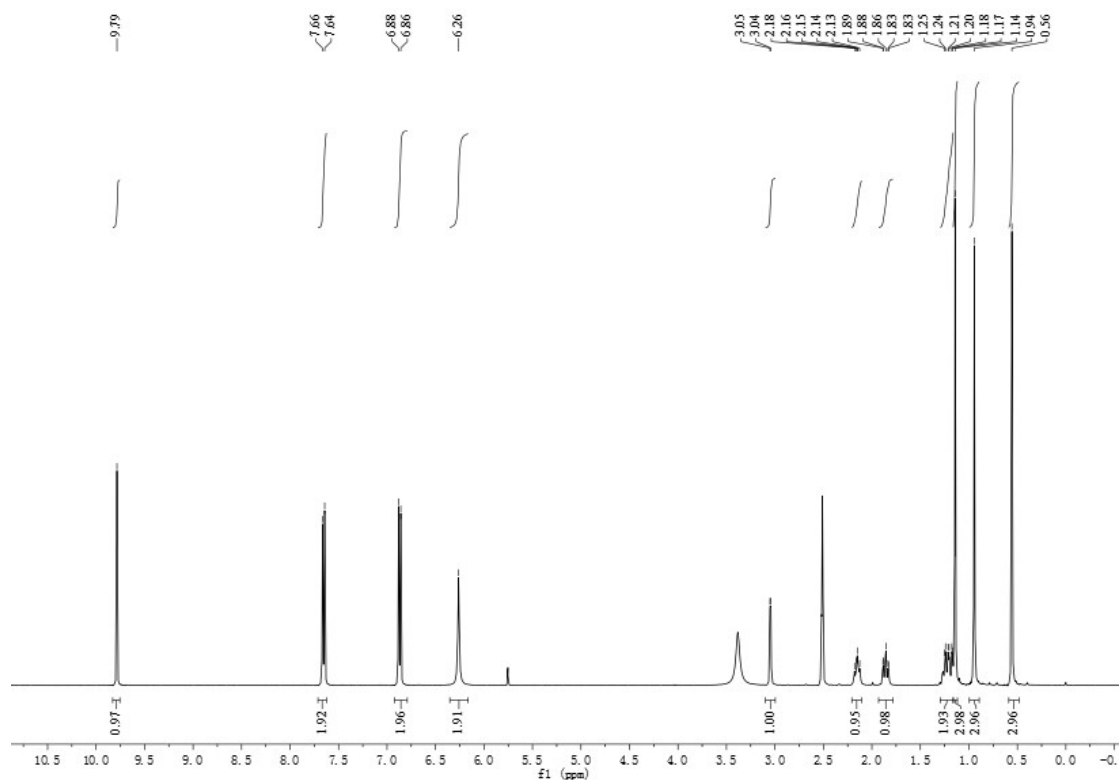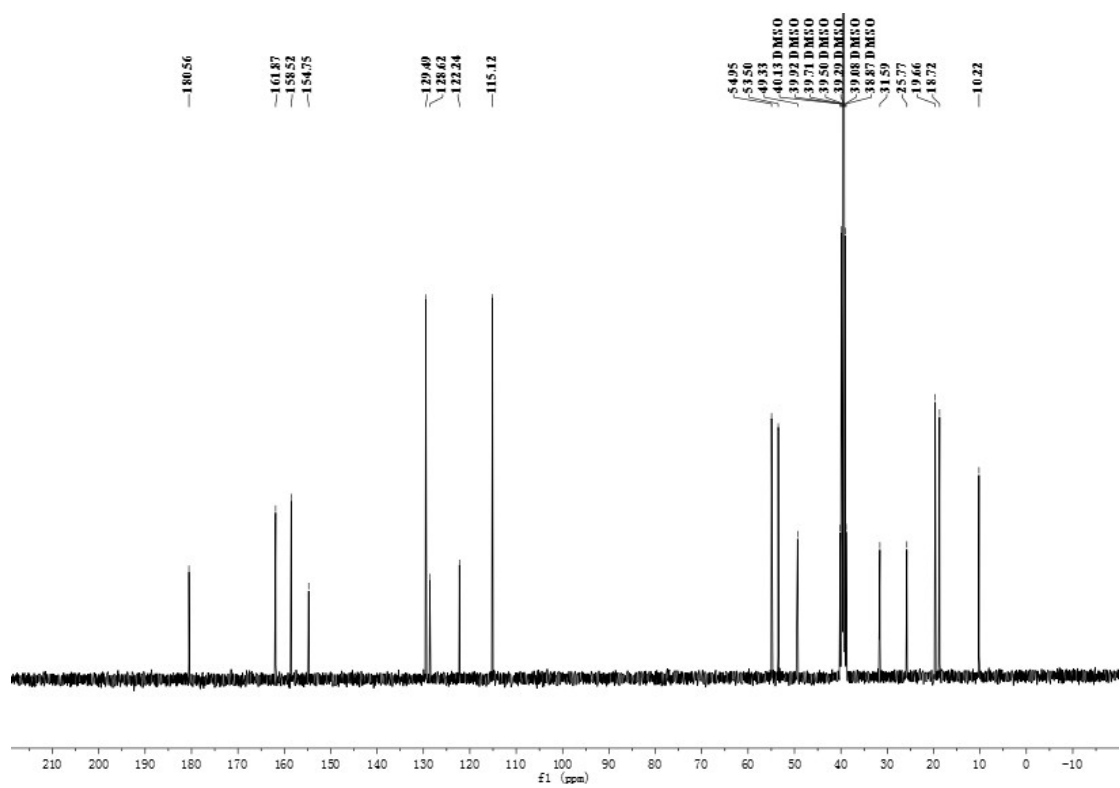

3s

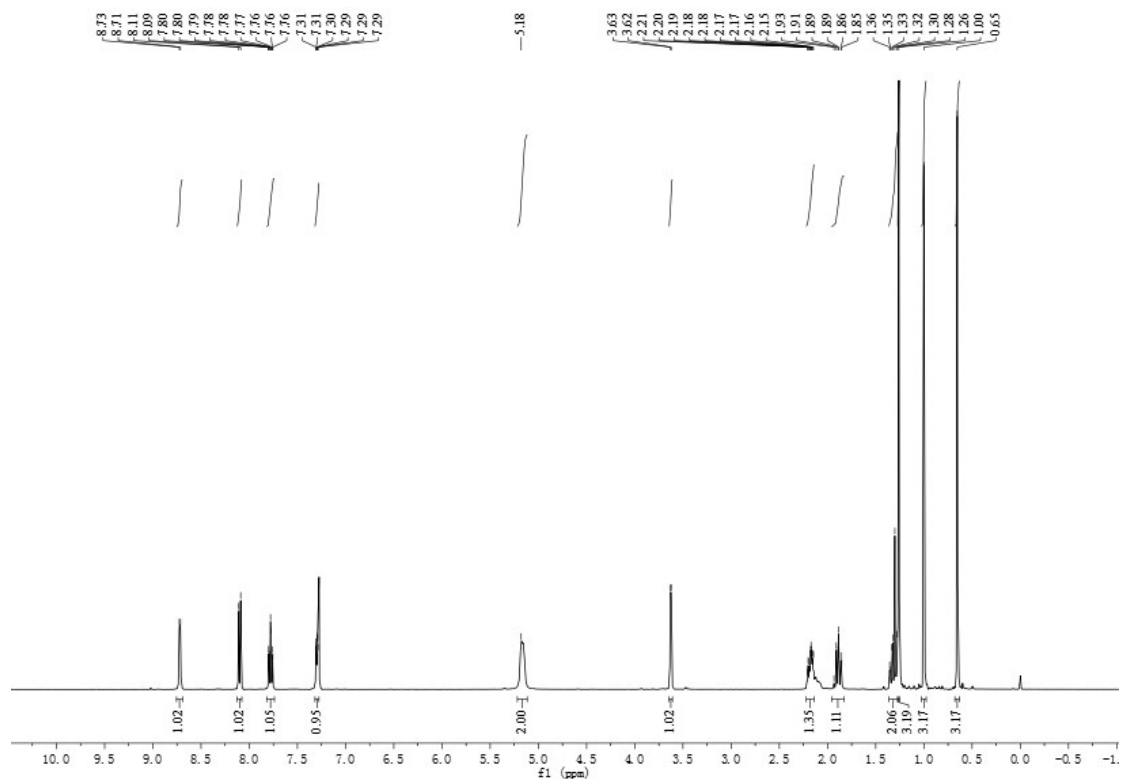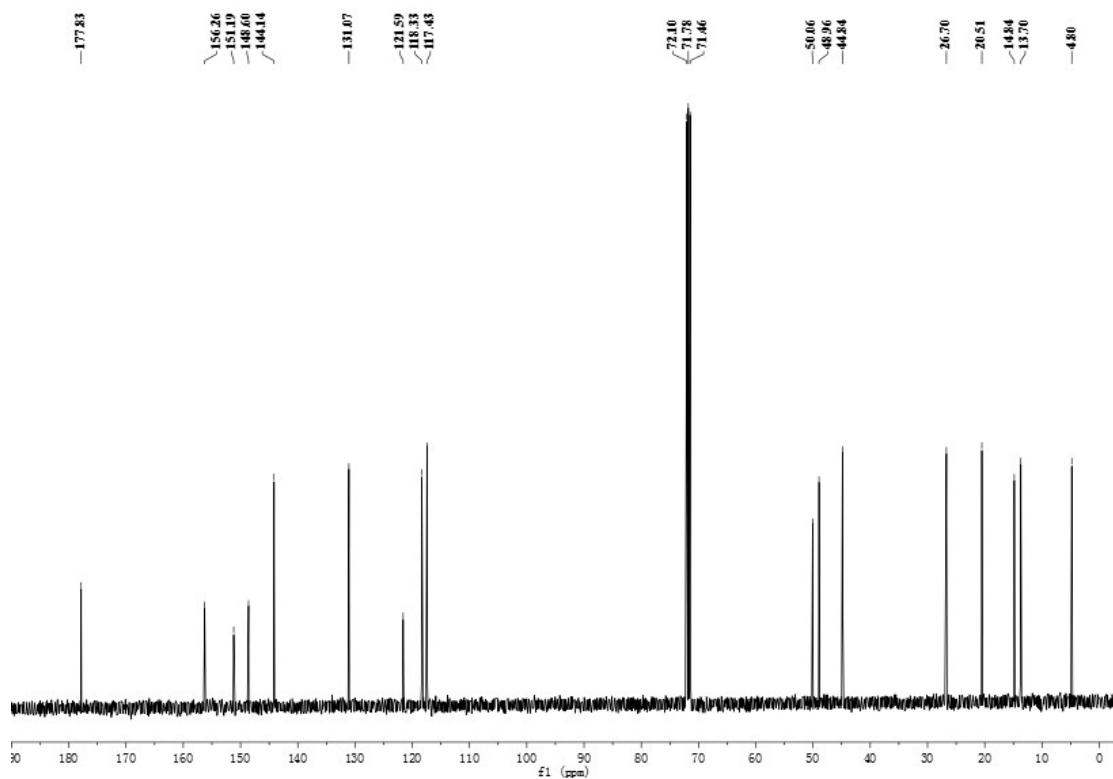

3t

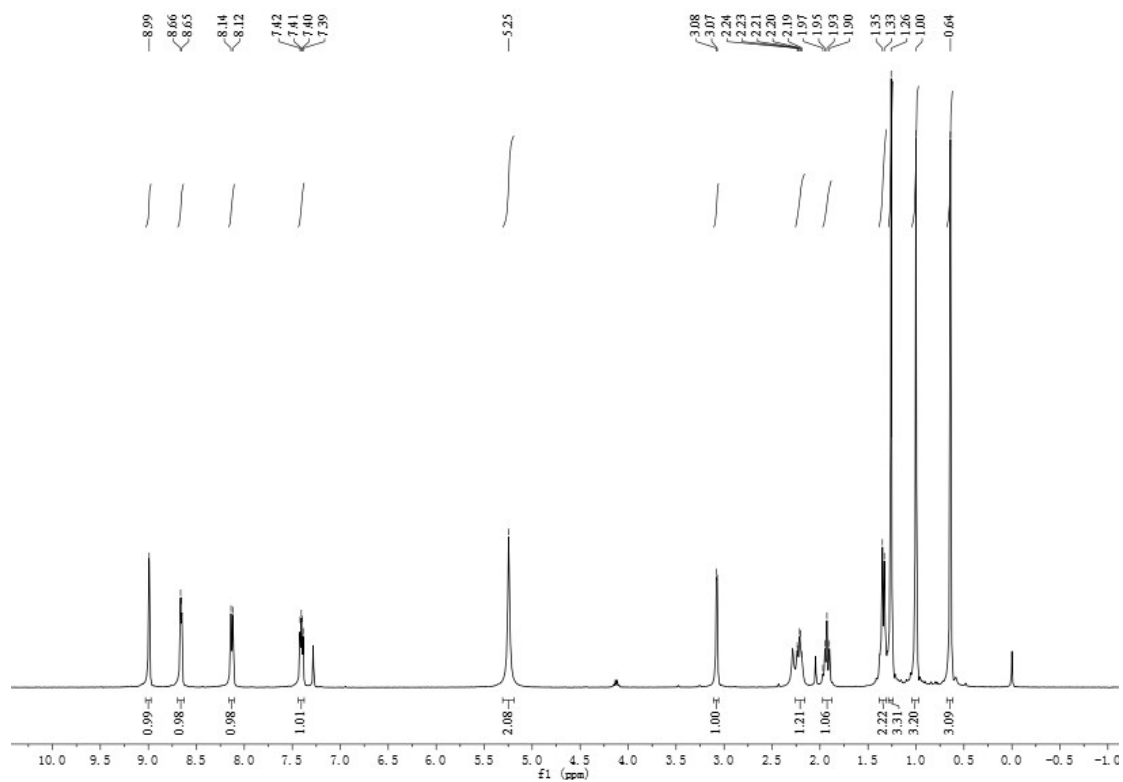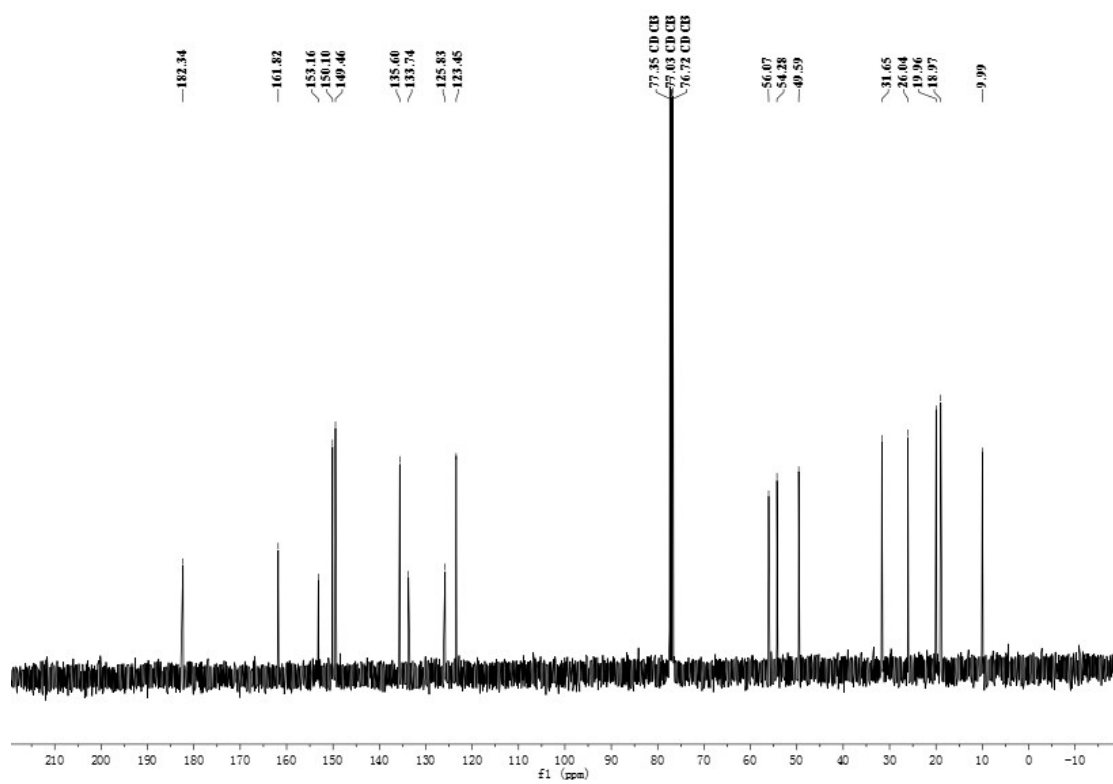

3u

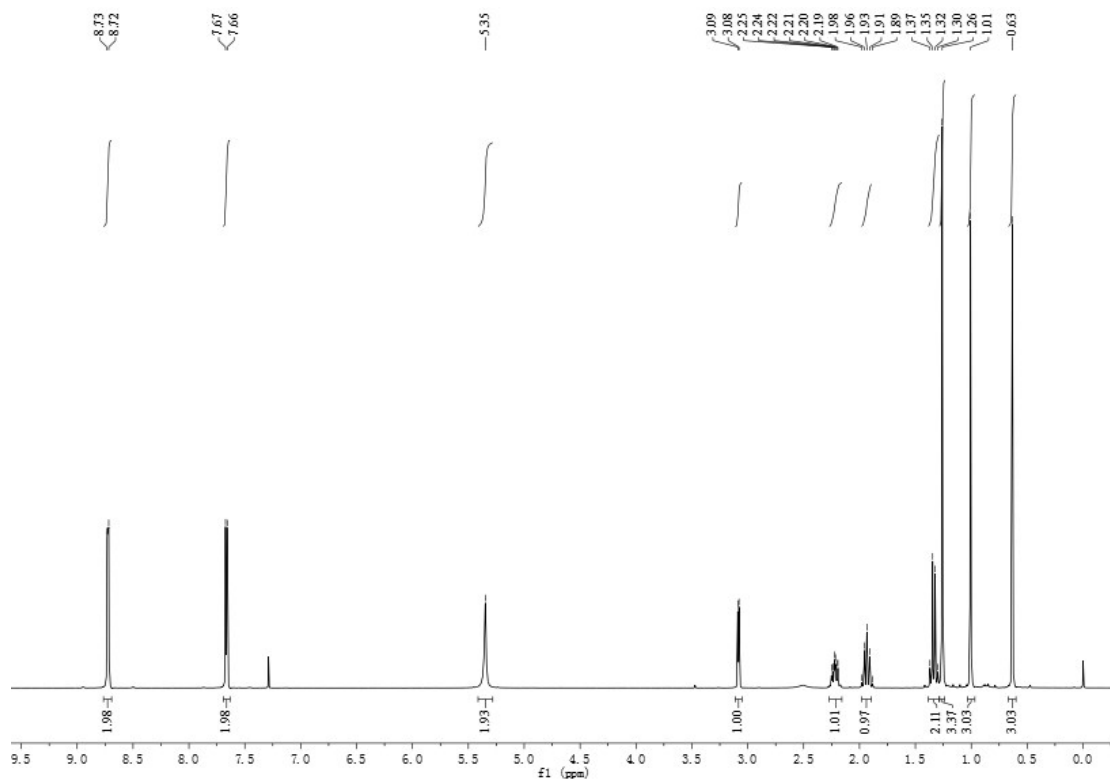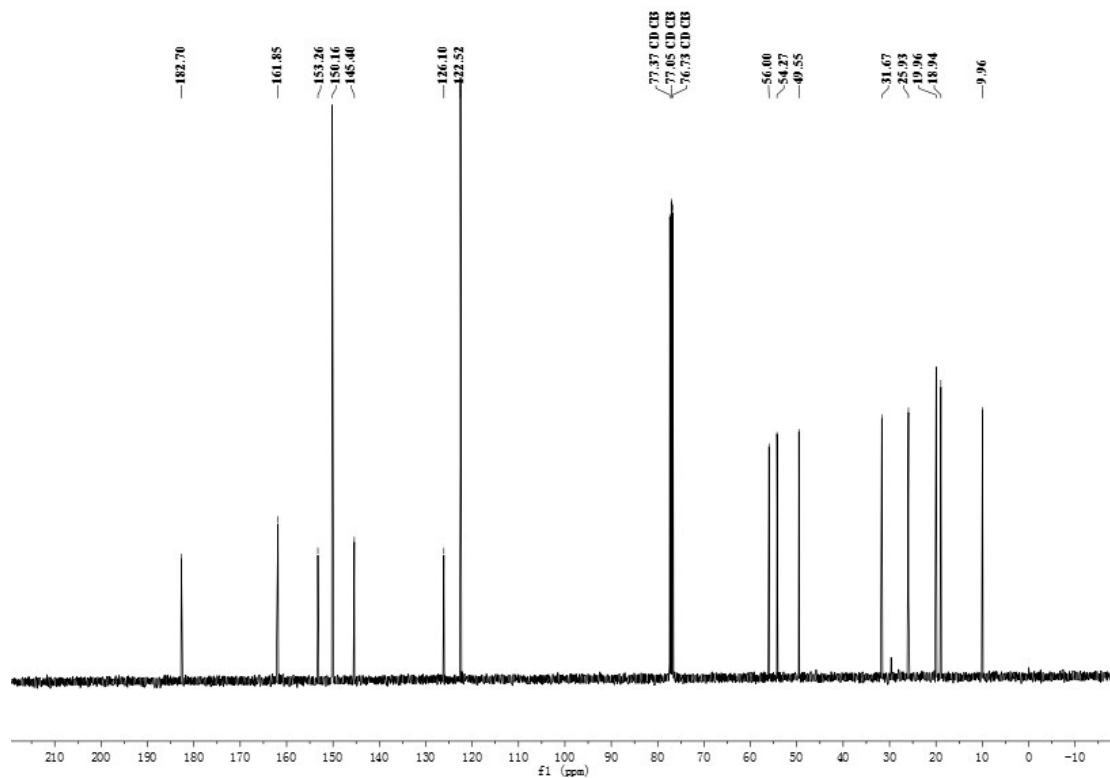

3v

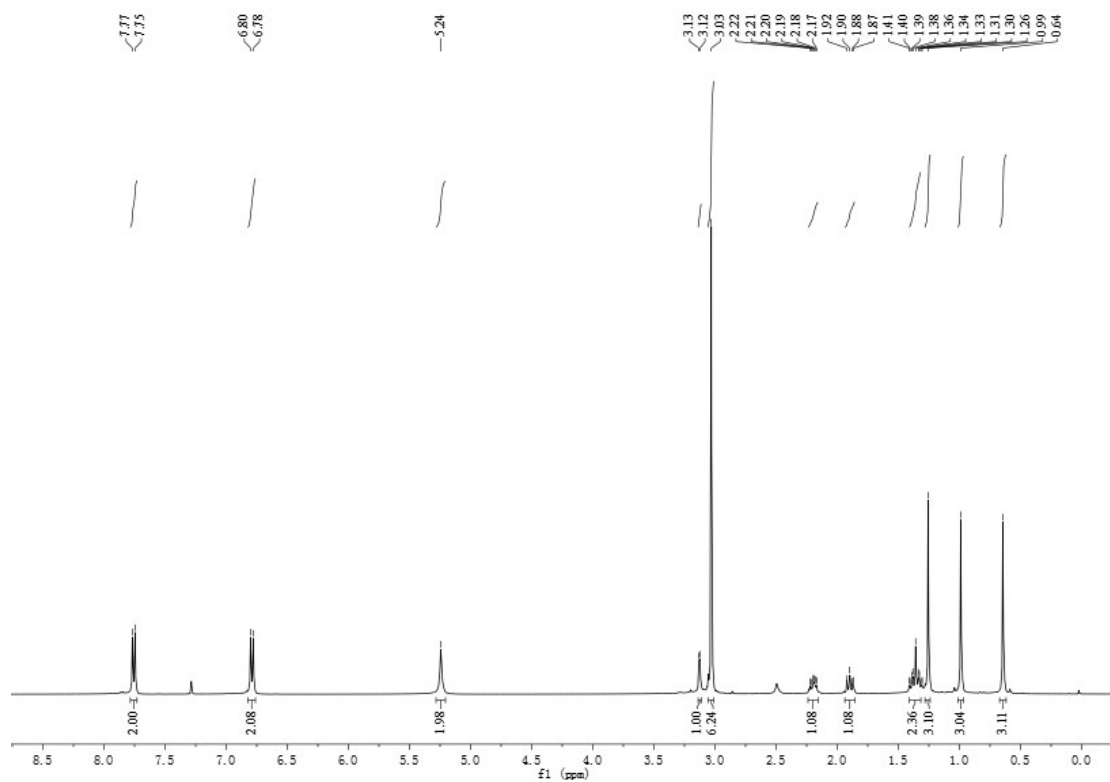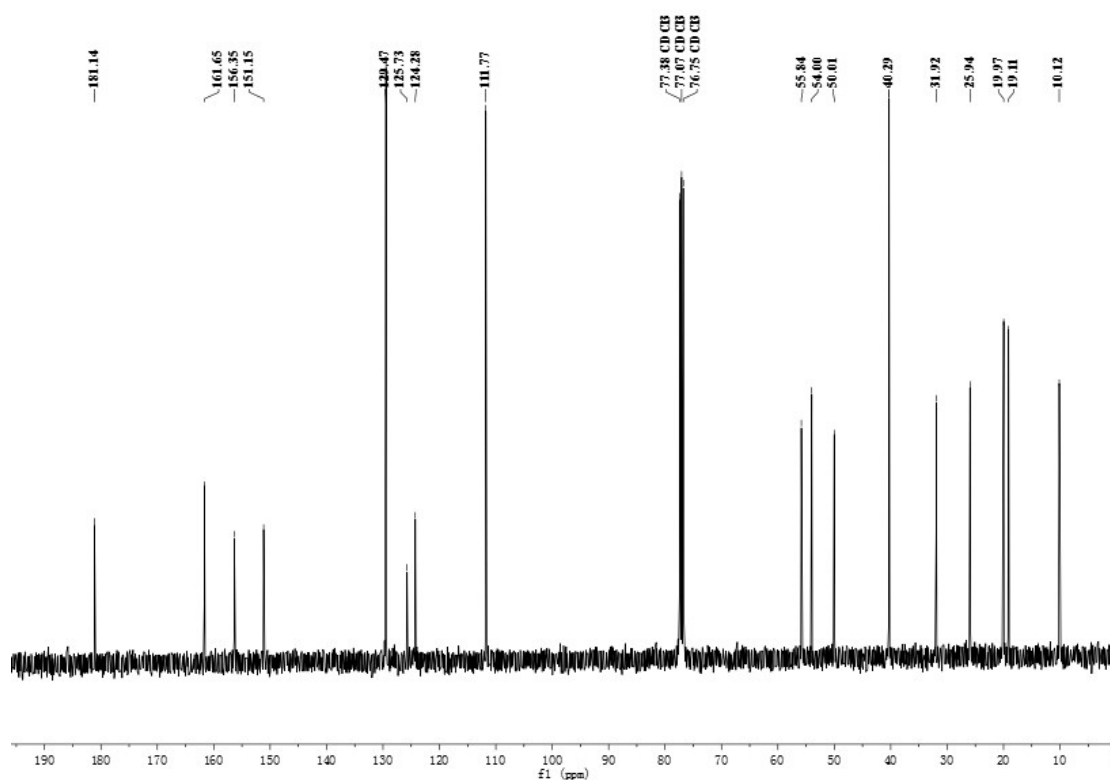



3x

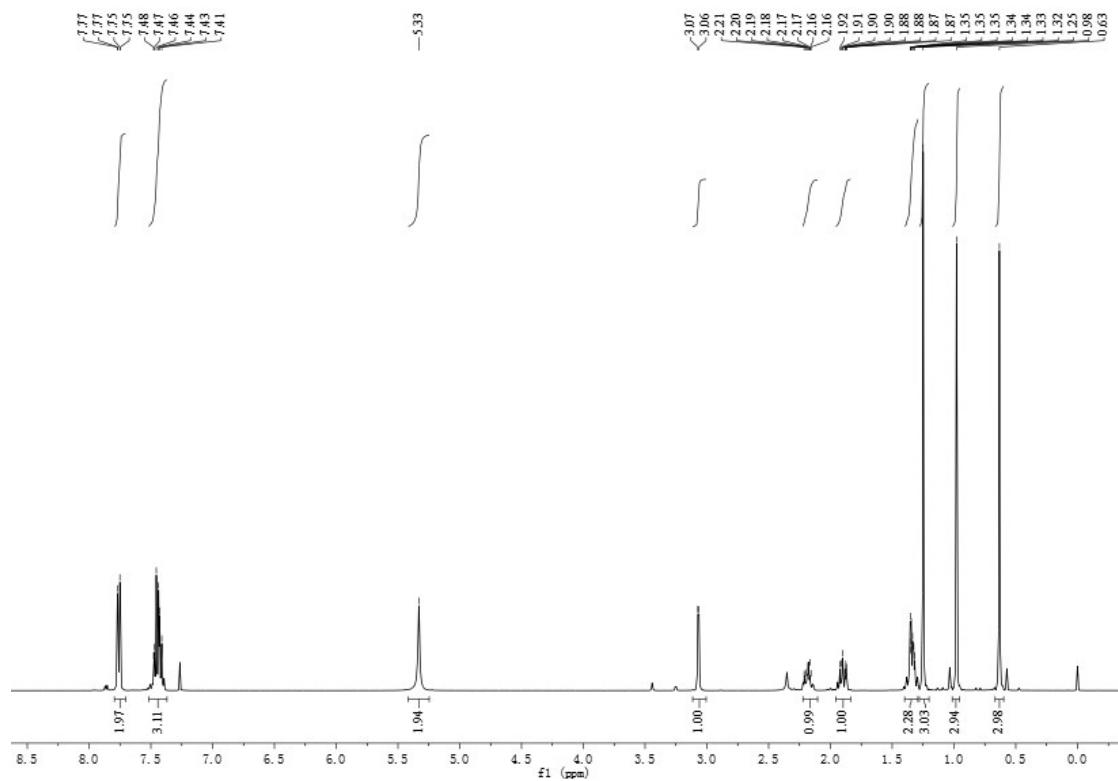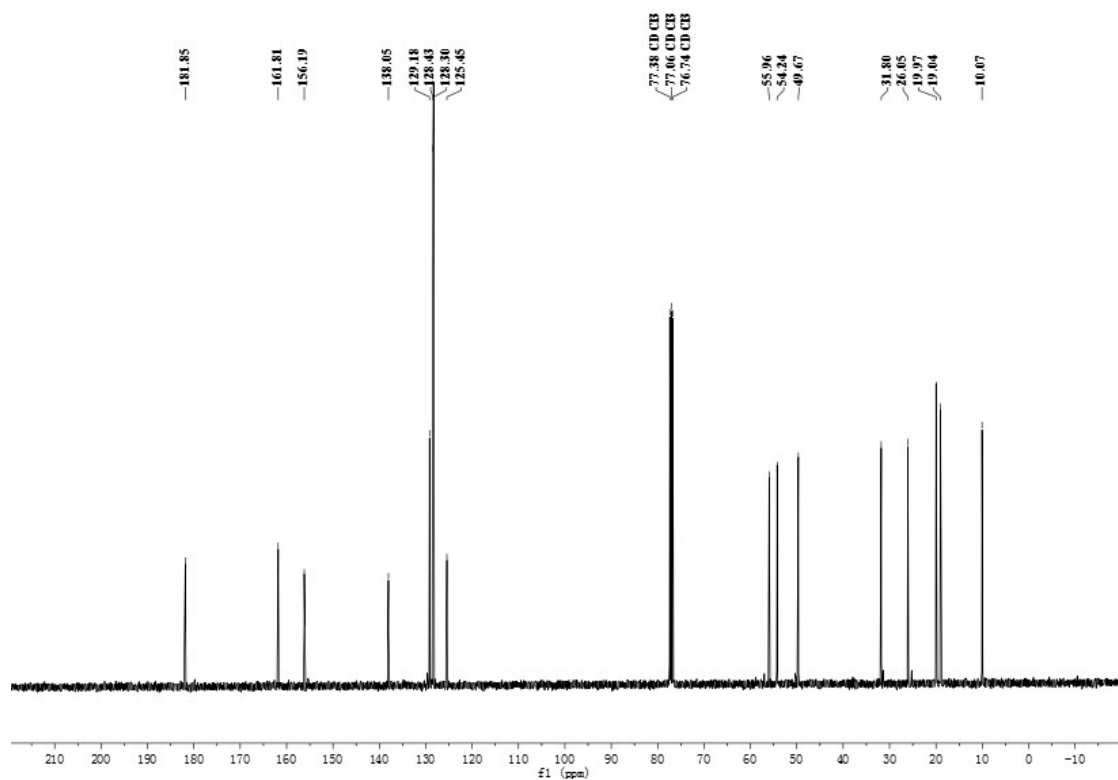

3a

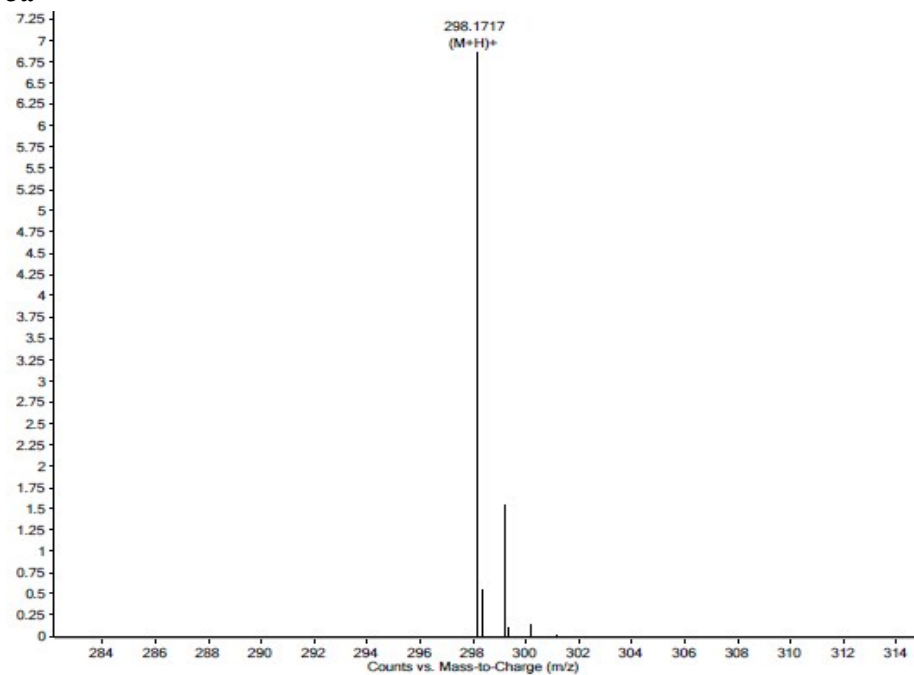

3b

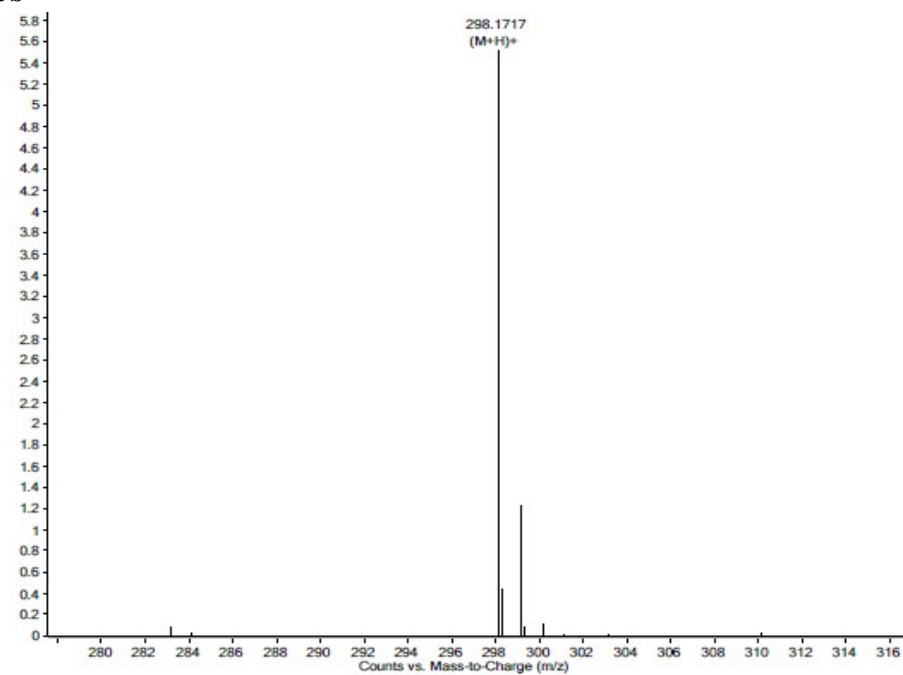

3c

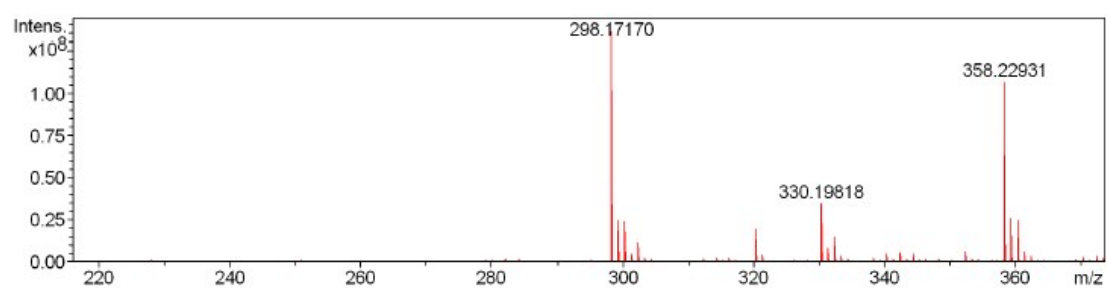

3d

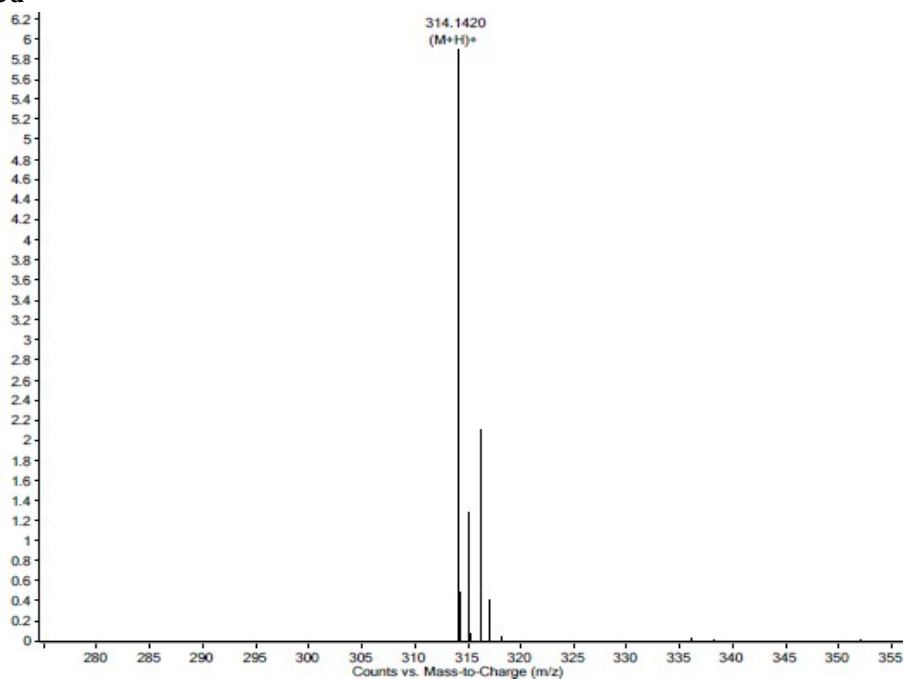

3e

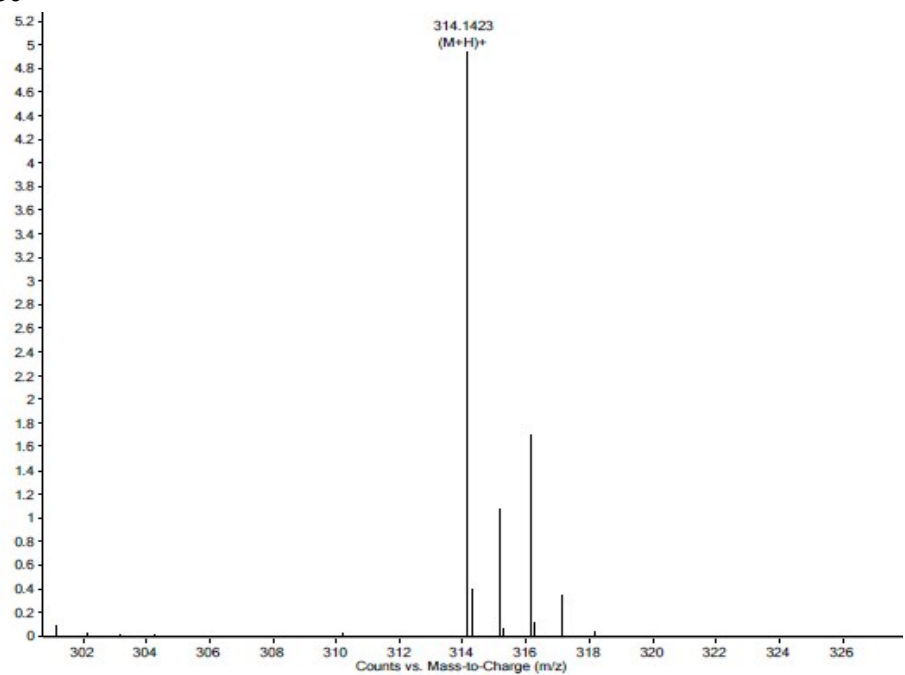

3f

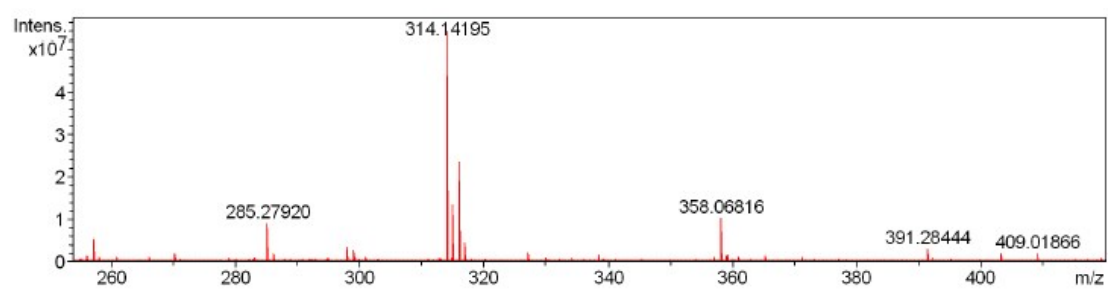

3g

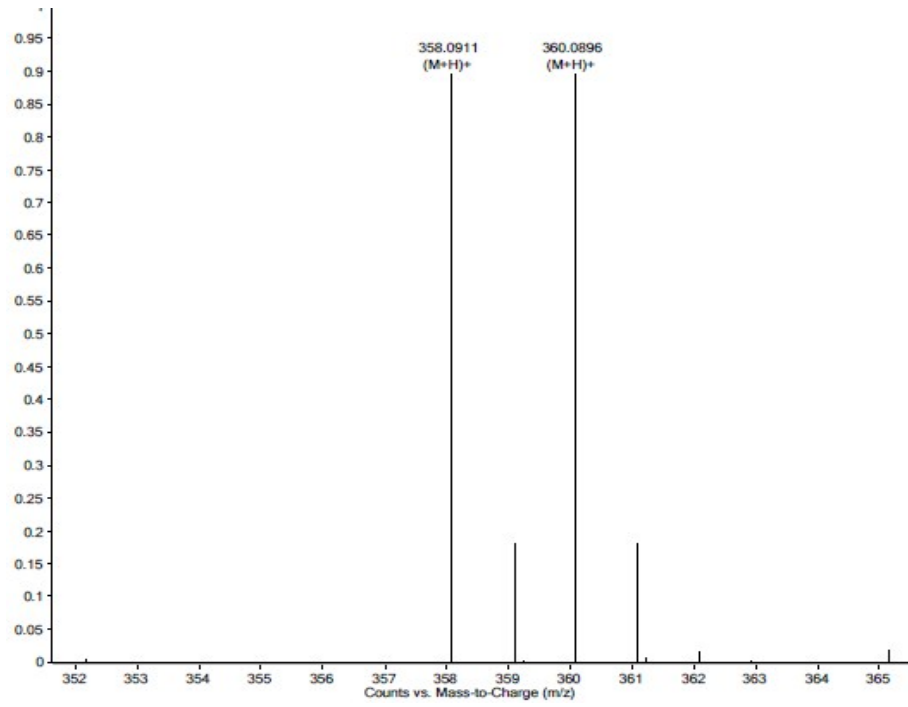

3h

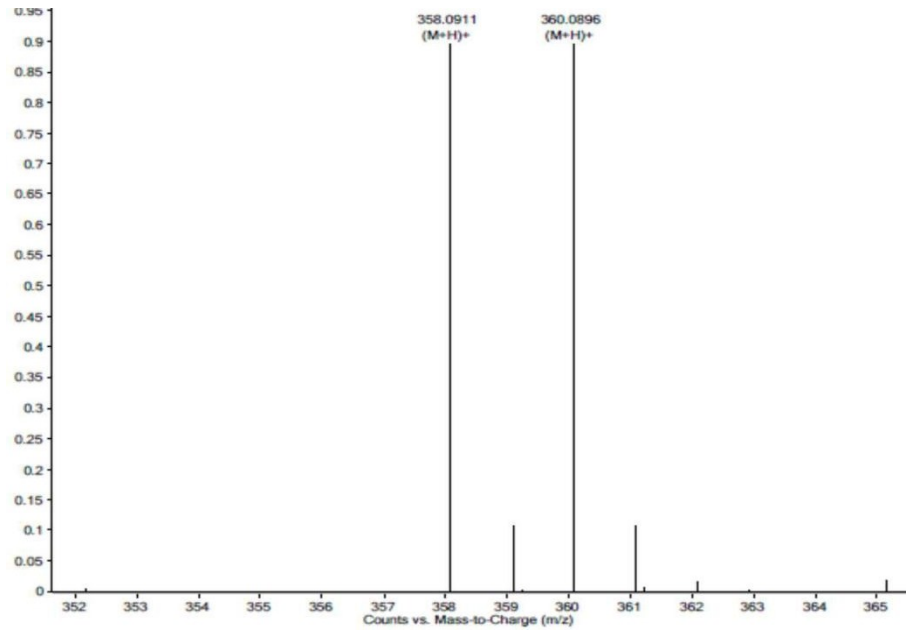

3i

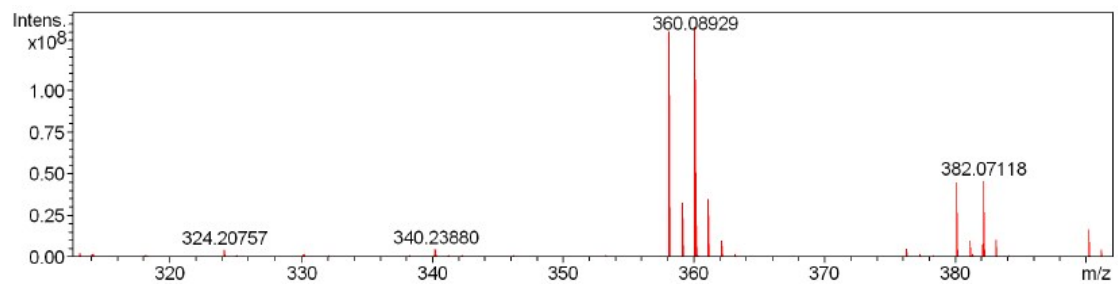

3j

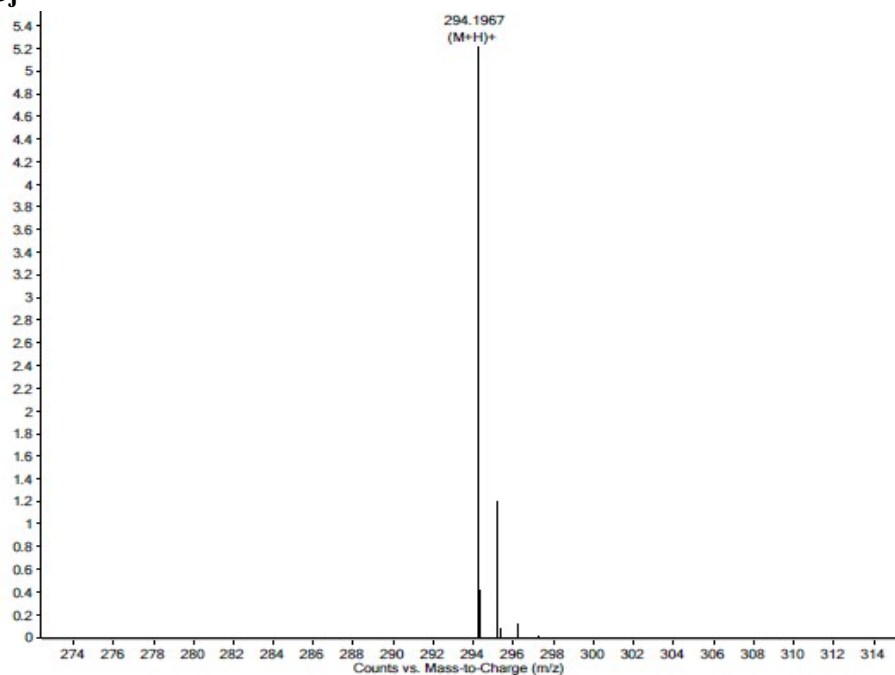

3k

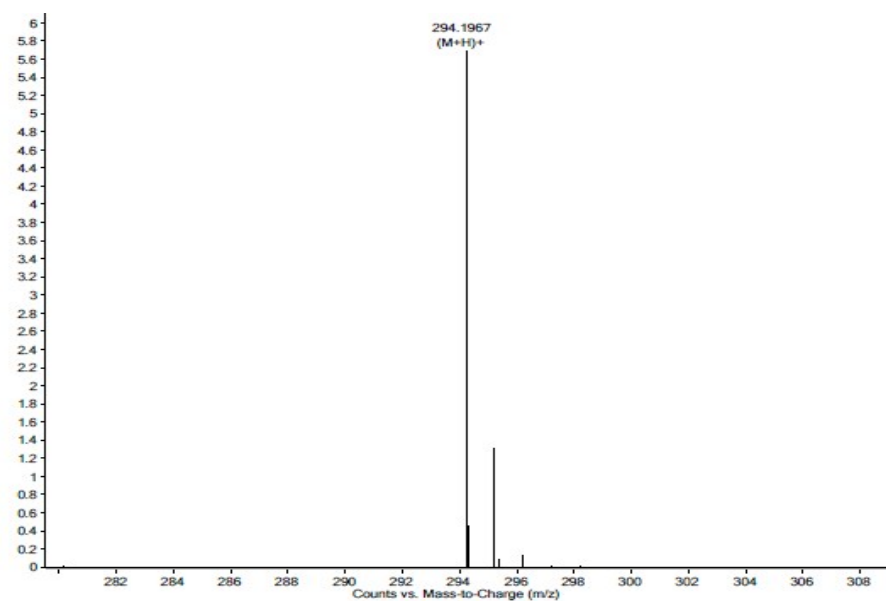

3l

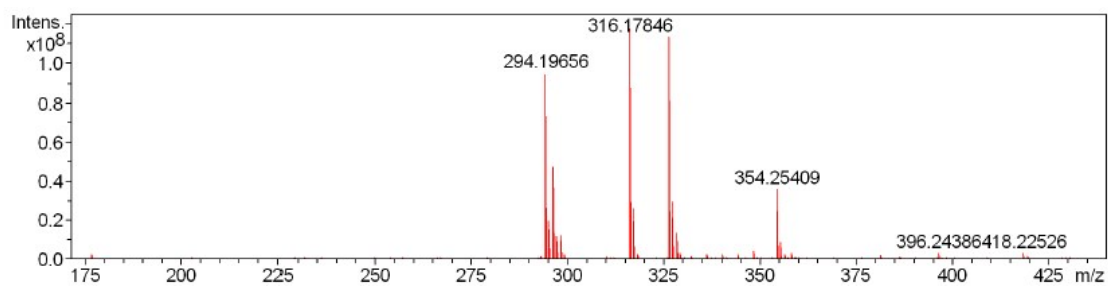

**3m**

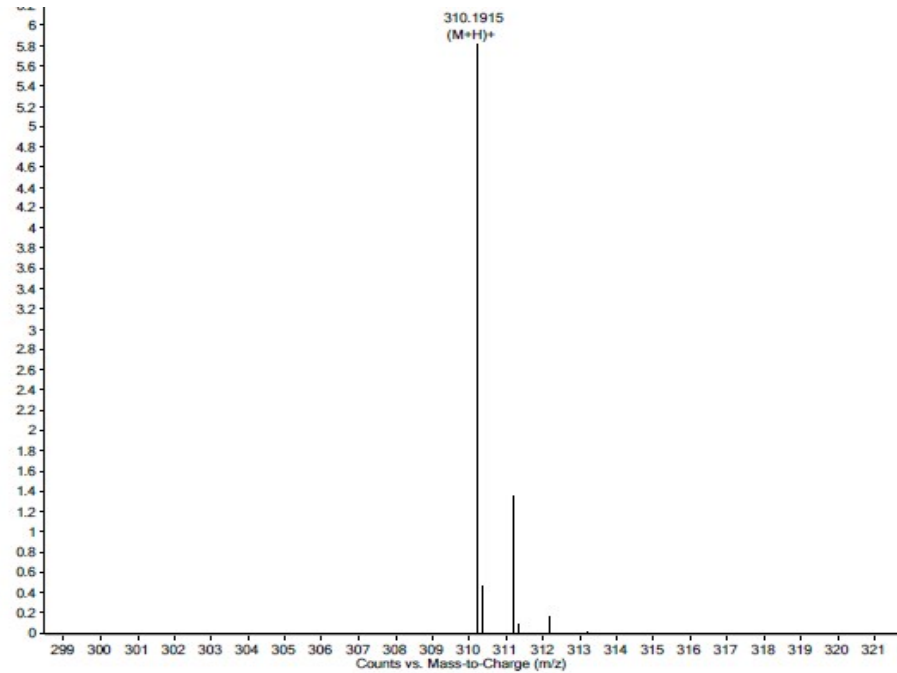

**3n**

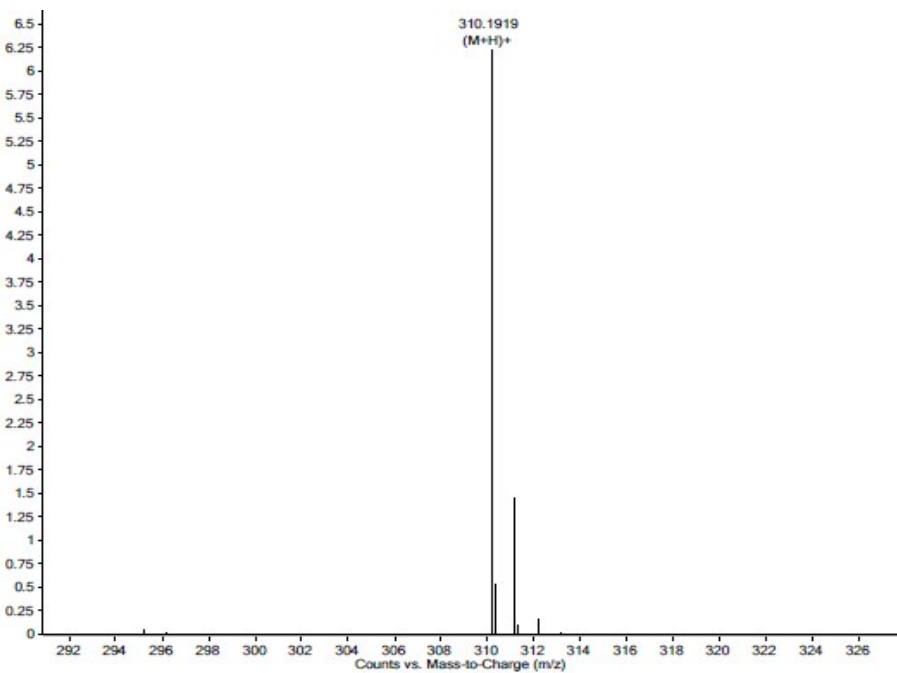

**3o**

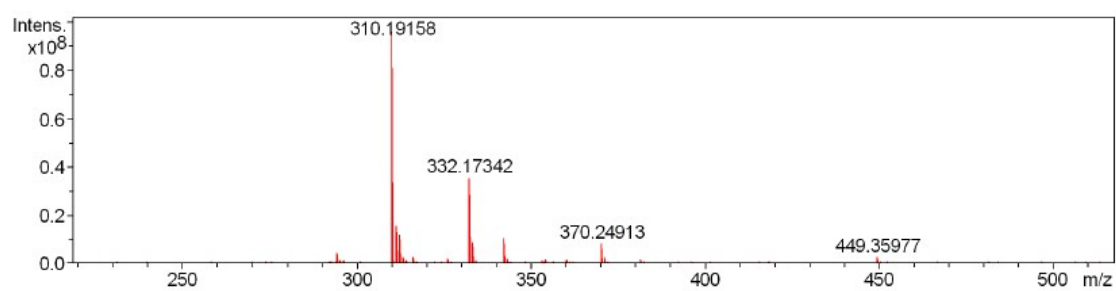

3p

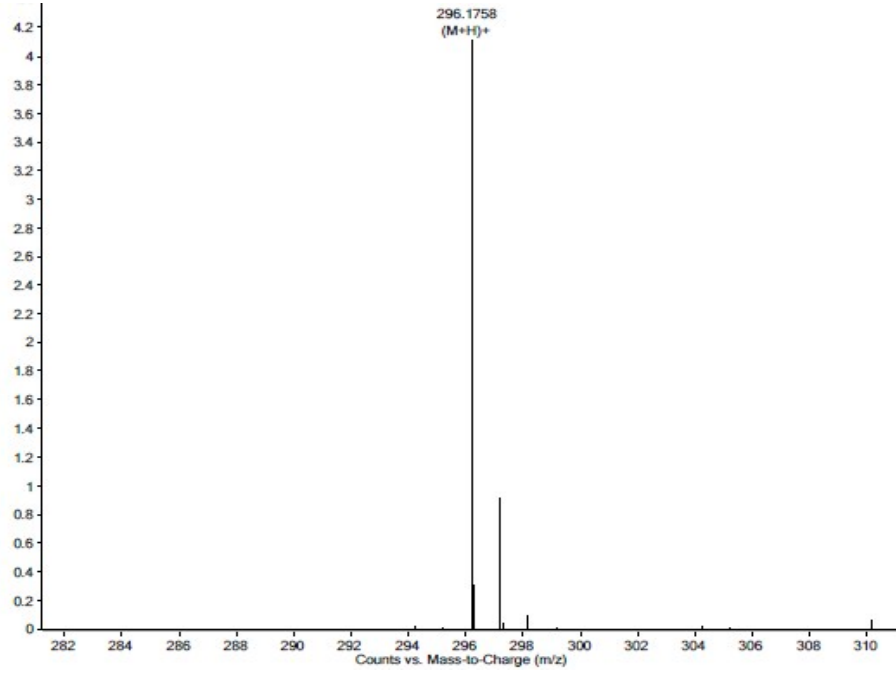

3q

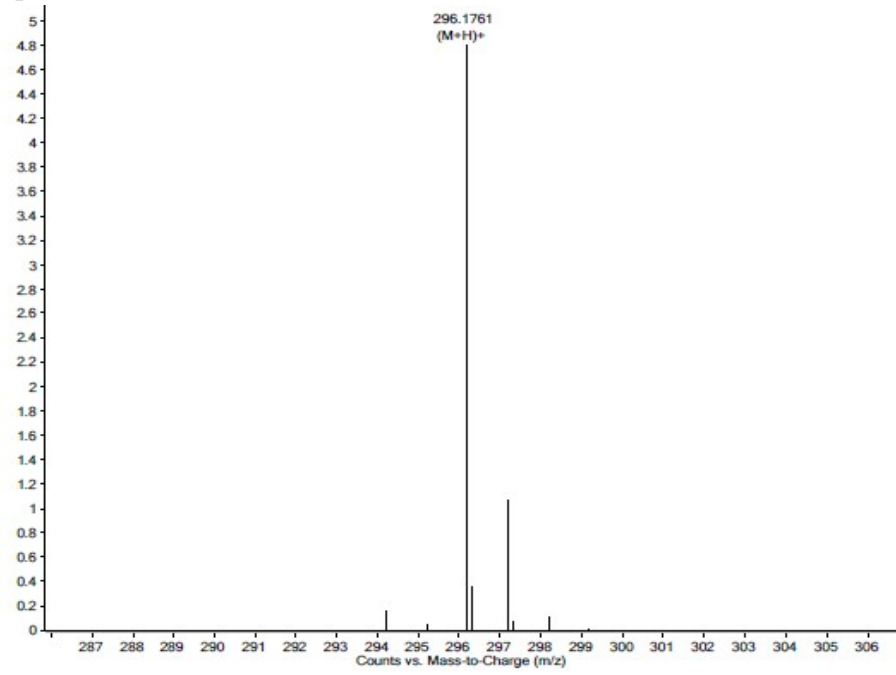

3r

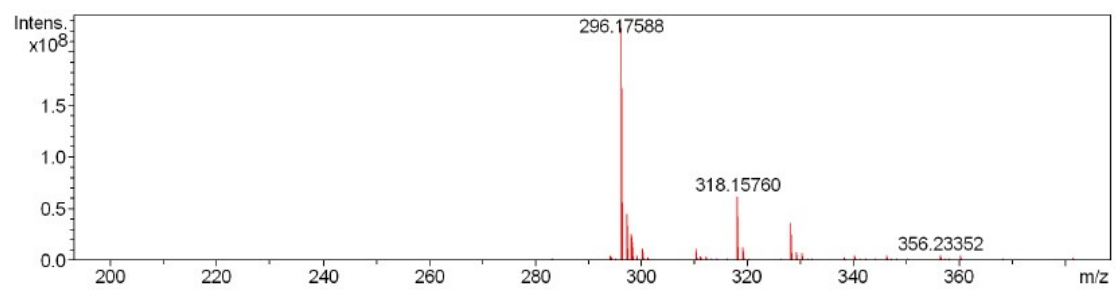

3s

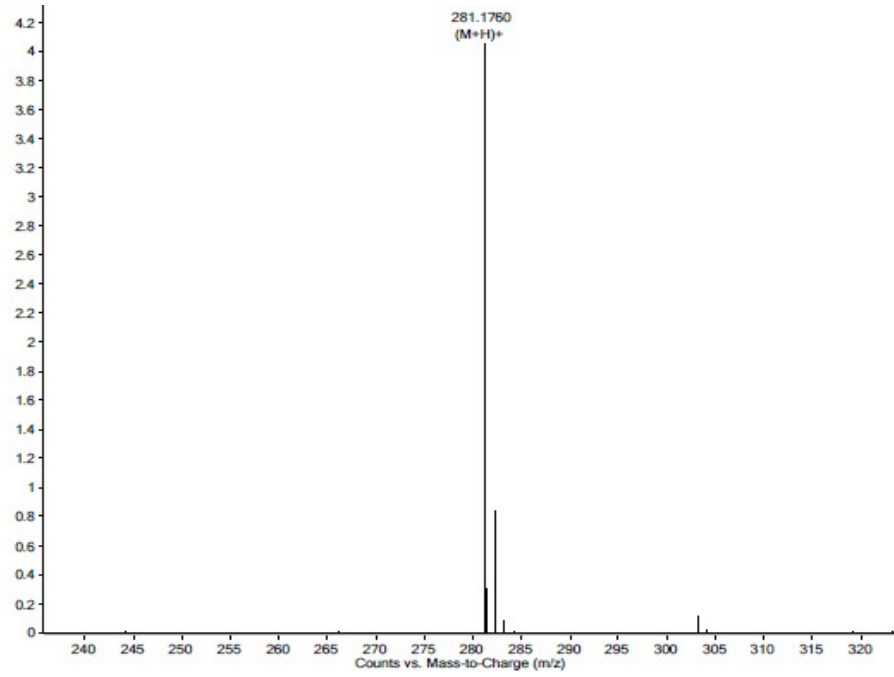

3t

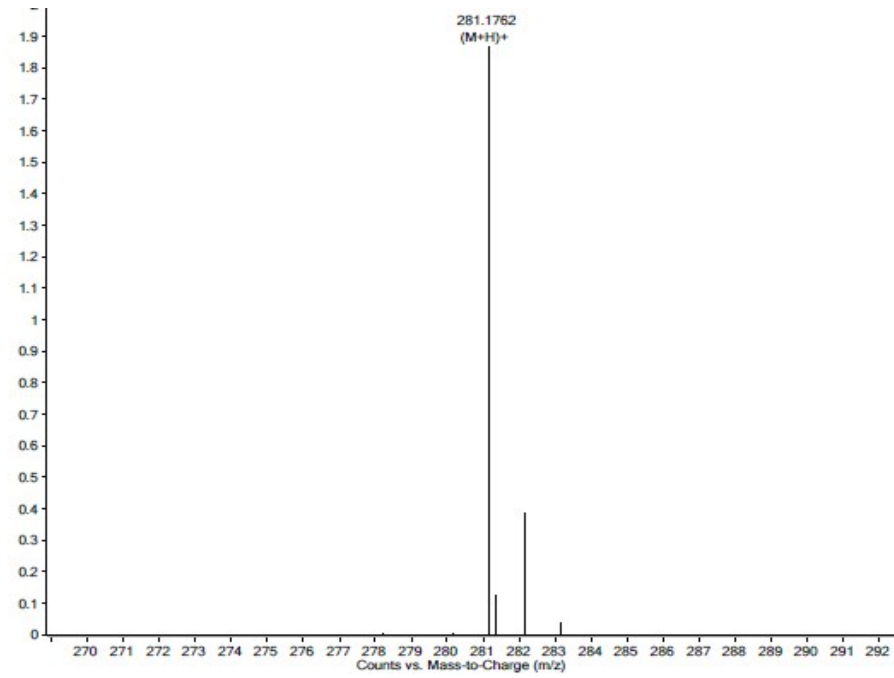

3u

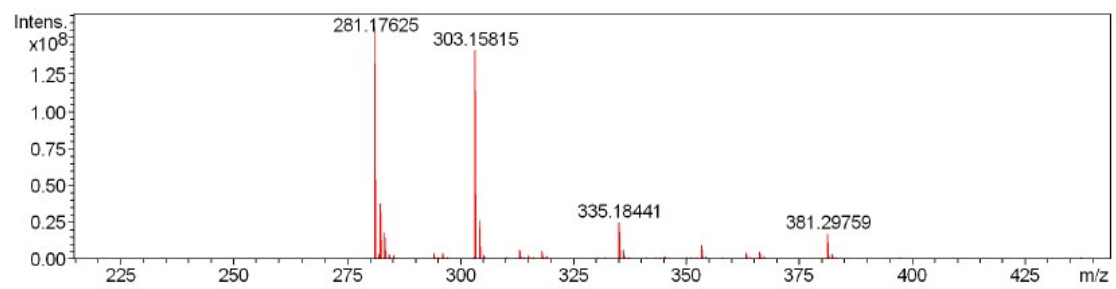



**3v**

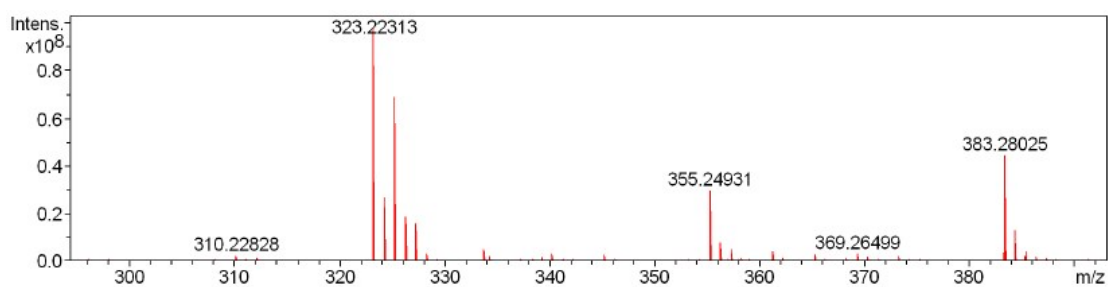

**3w**

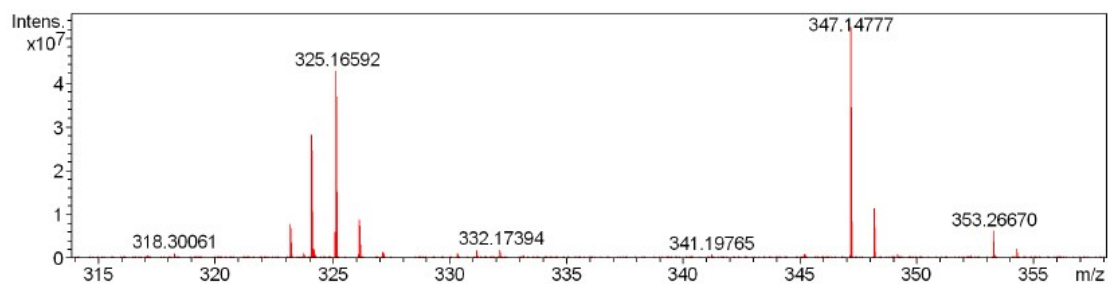

**3x**

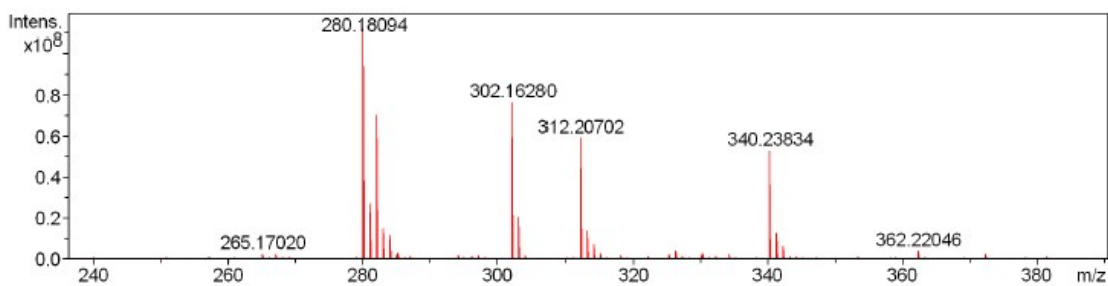

Supplement: c9ra05900h1.pdf [file c9ra05900h1.pdf]
